# Supplementary material for: Guidance on how to develop complex interventions to improve health and healthcare
Source: PubMed Central journal article supplement (PMC6701588; doi:10.1136/bmjopen-2019-029954), 2019-08-15
Supplement: bmjopen-2019-029954.draft_revisions.pdf [file bmjopen-2019-029954.draft_revisions.pdf]

# BMJ Open

BMJ Open is committed to open peer review. As part of this commitment we make the peer review history of every article we publish publicly available.

When an article is published we post the peer reviewers' comments and the authors' responses online. We also post the versions of the paper that were used during peer review. These are the versions that the peer review comments apply to.

The versions of the paper that follow are the versions that were submitted during the peer review process. They are not the versions of record or the final published versions. They should not be cited or distributed as the published version of this manuscript.

BMJ Open is an open access journal and the full, final, typeset and author-corrected version of record of the manuscript is available on our site with no access controls, subscription charges or pay-per-view fees (<http://bmjopen.bmj.com>).

If you have any questions on BMJ Open's open peer review process please email [info.bmjopen@bmj.com](mailto:info.bmjopen@bmj.com)

# BMJ Open

## Guidance on how to develop complex interventions to improve health and health care

|                                 |                                                                                                                                                                                                                                                                                                                                                                                                                                                                                                                                                                                                                                                          |
|---------------------------------|----------------------------------------------------------------------------------------------------------------------------------------------------------------------------------------------------------------------------------------------------------------------------------------------------------------------------------------------------------------------------------------------------------------------------------------------------------------------------------------------------------------------------------------------------------------------------------------------------------------------------------------------------------|
| Journal:                        | <i>BMJ Open</i>                                                                                                                                                                                                                                                                                                                                                                                                                                                                                                                                                                                                                                          |
| Manuscript ID                   | bmjopen-2019-029954.R1                                                                                                                                                                                                                                                                                                                                                                                                                                                                                                                                                                                                                                   |
| Article Type:                   | Communication                                                                                                                                                                                                                                                                                                                                                                                                                                                                                                                                                                                                                                            |
| Date Submitted by the Author:   | 27-Feb-2019                                                                                                                                                                                                                                                                                                                                                                                                                                                                                                                                                                                                                                              |
| Complete List of Authors:       | O'Cathain, Alicia; University of Sheffield School of Health and Related Research<br>Croot, Liz; University of Sheffield, MCRU,SCHARR<br>Duncan, Edward; University of Stirling<br>Rousseau, Nikki; University of Stirling<br>Sworn, Katie; University of Sheffield, Health Economics and Decision Science, School of Health and Related Research<br>Turner, Katrina; University of Bristol, School of Social and Community Medicine<br>Yardley, Lucy; University of Southampton, Psychology; University of Bristol, School of Health Sciences<br>Hoddinott, Pat; University of Stirling, Nursing, Midwifery and Allied Health Professional Research Unit |
| <b>Primary Subject Heading</b>: | Health services research                                                                                                                                                                                                                                                                                                                                                                                                                                                                                                                                                                                                                                 |
| Secondary Subject Heading:      | Public health                                                                                                                                                                                                                                                                                                                                                                                                                                                                                                                                                                                                                                            |
| Keywords:                       | intervention development, guidance, health                                                                                                                                                                                                                                                                                                                                                                                                                                                                                                                                                                                                               |
|                                 |                                                                                                                                                                                                                                                                                                                                                                                                                                                                                                                                                                                                                                                          |

SCHOLARONE™  
Manuscripts

### **Guidance on how to develop complex interventions to improve health and health care**

\*Alicia O’Cathain School of Health and Related Research (SchARR), University of Sheffield, Professor

Liz Croot, School of Health and Related Research (SchARR), University of Sheffield, Senior Research Fellow

Ed Duncan, NMAHP Research Unit, University of Stirling, Associate Professor

Nikki Rousseau NMAHP Research Unit, University of Stirling, Research Fellow

Katie Sworn, School of Health and Related Research (SchARR), University of Sheffield, Research Associate

Katrina Turner, Population Health Sciences, University of Bristol, Reader

Lucy Yardley, School of Psychological Sciences, University of Bristol, Professor

Pat Hoddinott, NMAHP Research Unit, University of Stirling, Professor

#### **\*Corresponding author**

The Corresponding Author has the right to grant on behalf of all authors and does grant on behalf of all authors, an exclusive licence on a worldwide basis to the BMJ Publishing Group Ltd to permit this article (if accepted) to be published in BMJ editions and any other BMJ PGL products and sublicences such use and exploit all subsidiary rights, as set out in our licence.

All authors have completed the Unified Competing Interest form (available on request from the corresponding author) and declare: financial support from Medical Research Council and NIHR for this study; no financial relationships with any organisations that might have an interest in the submitted work in the previous three years, no other relationships or activities that could appear to have influenced the submitted work.

## Abstract

The United Kingdom Medical Research Council (UK MRC) published influential guidance on developing and evaluating complex interventions, presenting a framework of four phases: development, feasibility/piloting, evaluation, and implementation. The development phase is what happens between the idea for an intervention and formal pilot testing in the next phase. This phase was briefly outlined in the original MRC guidance. Here we present more detailed guidance on intervention development.

Key principles and actions for consideration include seeing intervention development as a dynamic iterative process, involving stakeholders, reviewing published research evidence, drawing on existing theories, articulating programme theory, undertaking primary data collection, understanding context, paying attention to future implementation in the real world, and designing and refining an intervention using iterative cycles of development with stakeholder input at each cycle.

## Strengths and limitations

The guidance is based on systematic reviews, qualitative interviews with experts and a consensus exercise.

The guidance is based on expert opinion because there is limited evidence to show that taking any specific action will result in a successful intervention.

An international perspective was taken but low and middle income countries were not well represented in the evidence underlying the guidance or the Expert Panel advising the production of the guidance.

## Introduction

There is increasing demand for new interventions as policymakers and clinicians grapple with complex challenges, such as integration of health and social care, risk associated with lifestyle behaviours, multi-morbidity and the use of e-health technology. Complex interventions are often required to address these challenges. Complex interventions can have a number of interacting components, require new behaviours by those delivering or receiving the intervention, or have a variety of outcomes.<sup>1</sup> An example is a multicomponent intervention to help people stand more at work, including a height adjustable workstation, posters, and coaching sessions.<sup>2</sup> Careful development of complex interventions is necessary so that new interventions have a better chance of being effective when evaluated, and being adopted widely in the real world. Researchers, the public, patients, industry, charities, care providers including clinicians, and policy makers can all be involved in the development of new interventions to improve health, and all have an interest in how best to do this.

The United Kingdom Medical Research Council (UK MRC) published influential guidance on developing and evaluating complex interventions, presenting a framework of four phases: development, feasibility/piloting, evaluation, and implementation.<sup>1</sup> The development phase is what happens between the idea for an intervention and formal pilot testing in the next phase.<sup>3</sup> This phase was briefly outlined in the original MRC guidance. Here we present more detailed guidance on intervention development.

### How this guidance was developed

This guidance is based on a study funded by the MRC and the National Institute for Health Research in the UK, with triangulation of evidence from three sources. First, we undertook a review of published approaches to intervention development that offer developers guidance on specific ways to develop interventions,<sup>4</sup> and a review of primary research reporting intervention development. Second, we carried out qualitative interviews with experts in intervention development and wider stakeholders involved with the process, including members of the public, patients, funders and journal editors.<sup>6</sup> Third, we conducted a consensus exercise consisting of two simultaneous and identical e-Delphi studies distributed to intervention developers and wider stakeholders respectively, and followed this with a consensus workshop. In the two e-Delphi studies we asked participants to rate around 80 items on a five point scale from 'very' to 'not important' using the question 'when developing complex interventions to improve health, how important is it to'. In addition to these research methods we convened an international expert panel with members from the UK, United States of America and Europe early in the project to guide the research. Members of this expert panel participated in the e-Delphi studies and consensus workshop alongside other participants.

### Framework for intervention development

This guidance is based on expert opinion because there is a research evidence gap about which actions are needed in intervention development to produce successful interventions. Some systematic reviews have been undertaken to try to determine whether following a specific published approach, or undertaking a specific action, results in effective interventions. Unfortunately this evidence base is sparse, largely due to the difficulty of empirically addressing this question.<sup>7-9</sup> Evidence tends to focus on the use of existing theory within intervention development – for example the theory of Diffusion of Innovation, or theories on behaviour change - and shows that existing theory is more commonly reported in effective interventions.<sup>10</sup> However, the evidence base is not consistent, with concerns expressed that the relationship between theory use and effectiveness is weak and may not be causal.<sup>11</sup>

Key principles and actions of intervention development are summarised below. More detailed guidance for the principles and actions is available at <https://www.sheffield.ac.uk/scharr/sections/hsr/mcru/indexstudy>.

#### Key principles of intervention development

Key principles of intervention development are that it is dynamic, iterative, creative, open to change, and forward looking to future evaluation and implementation. Developers are likely to move backwards and forwards dynamically between overlapping actions within intervention development, such as reviewing evidence, drawing on existing theory and working with stakeholders. There will also be iterative cycles of developing a version of the intervention, getting feedback from stakeholders to identify problems, implementing potential solutions, and starting the cycle again until the team feels they have an intervention that is worthwhile evaluating. These cycles will involve using quantitative and qualitative research methods to measure processes and intermediate outcomes, and assess the acceptability, feasibility, desirability and potential unintended harms of the intervention.

Developers may start the intervention development with strong beliefs about the need for the intervention, its content or format, or how it should be delivered. They may also believe that it is possible to develop an intervention with a good chance of being effective, or that it can only do good

not harm. Being open to alternative possibilities throughout the development process may lead to abandoning the endeavour or taking steps back as well as forward. The rationale for being open to change is that this may reduce the possibility of developing an intervention that fails during future evaluation or is never implemented in practice. Developers may also benefit from looking forward to how the intervention will be evaluated so they can make plans for this, and identify learning and key uncertainties to be addressed in future evaluation.

#### Key actions of intervention development

Key actions for developers to consider are summarised in Table 1. It may not be possible or desirable for developers to address all these actions during their development process, and indeed some may not be relevant to every problem or context. The recommendation made here is that developers *consider the relevance and importance of these actions to their situation both at the start of, and throughout, the development process.*

These key actions are set out in Table 1 in what appears to be a sequence. However, in practice these actions are addressed in a dynamic way. That is, undertaken in parallel and revisited regularly as the intervention evolves, or they interact with each other when learning from one action influences plans for other actions. These actions are explored in more detail below and presented in a logic model for intervention development (Figure 1). A logic model is a diagram of how an intervention is proposed to work, showing mechanisms by which an intervention influences the proposed outcomes.<sup>12</sup> The short and long term effects of successful intervention development were informed by the qualitative interviews with developers and wider stakeholders.<sup>6</sup>

**Table 1 Framework of actions for intervention development**

| Action                       | Consider the relevance and importance of the following...                                                                                                                                                                                                                                                                                                                                                                                                                                                                                                                                                                                                                                                                                                                                                                                                                                                              |
|------------------------------|------------------------------------------------------------------------------------------------------------------------------------------------------------------------------------------------------------------------------------------------------------------------------------------------------------------------------------------------------------------------------------------------------------------------------------------------------------------------------------------------------------------------------------------------------------------------------------------------------------------------------------------------------------------------------------------------------------------------------------------------------------------------------------------------------------------------------------------------------------------------------------------------------------------------|
| Plan the development process | <p>Identify the problem to be targeted and refine understanding of it throughout the process</p> <p>Assess whether the problem is a priority</p> <p>Consider which aspects of the problem are amenable to change</p> <p>Ask whether a new intervention is really needed and if the potential benefit of the new intervention justifies the cost of development</p> <p>Determine the time needed to undertake intervention development</p> <p>Obtain sufficient resources/funding for the intervention development study</p> <p>Draw on one or more of the many published intervention development approaches, recognising that there is no evidence about which approach is best, and apply flexibly depending on the problem and context</p> <p>Involve stakeholders during the planning process (see next Action)</p> <p>Produce a protocol detailing the processes to be undertaken to develop the intervention</p> |

|                                                                                                      |                                                                                                                                                                                                                                                                                                                                                                                                                                                                                                                                                                                                                                                                                                                                                                                  |
|------------------------------------------------------------------------------------------------------|----------------------------------------------------------------------------------------------------------------------------------------------------------------------------------------------------------------------------------------------------------------------------------------------------------------------------------------------------------------------------------------------------------------------------------------------------------------------------------------------------------------------------------------------------------------------------------------------------------------------------------------------------------------------------------------------------------------------------------------------------------------------------------|
| <p>Involve stakeholders, including those who will deliver, use and benefit from the intervention</p> | <p>Work closely with relevant stakeholders throughout the development process: patients, the public, the target population, service providers, those who pay for health and social services or interventions, policy makers, and intervention design specialists</p> <p>Develop a plan at the start of the process to integrate public and patient involvement into the intervention development process</p> <p>Identify the best ways of working with each type of stakeholder, from consultation through to co-production, acknowledging that different ways may be relevant for different stakeholders at different times</p> <p>Use creative activities within team meetings to work with stakeholders to understand the problem and generate ideas for the intervention</p> |
| <p>Bring together a team and establish decision making processes</p>                                 | <p>Include within the development team individuals with relevant expertise: in the problem to be addressed by the intervention including those with personal experience of the problem, in behaviour change when the intervention aims to change behaviour, in maximising engagement of stakeholders, and with a strong track record in designing complex interventions</p> <p>It may be hard to make final decisions about the content, format and delivery of the intervention, so only some team members may do this. There is no consensus about the size or constituency of the team that makes these final decisions, but it is important early on to agree a process for making decisions within the team</p>                                                             |
| <p>Review published research evidence</p>                                                            | <p>Review published research evidence before starting to develop the intervention and throughout the development process e.g. to identify existing interventions, to understand the evidence base for each proposed substantive intervention component</p> <p>Look for, and take into account, evidence that the proposed intervention may not work in the way intended</p>                                                                                                                                                                                                                                                                                                                                                                                                      |
| <p>Draw on existing theories</p>                                                                     | <p>Identify an existing theory or framework of theories to inform the intervention at the start of the process e.g. behaviour change or implementation theory</p> <p>Where relevant, draw on more than one existing theory or framework of theories e.g. both psychological and organisational theories</p>                                                                                                                                                                                                                                                                                                                                                                                                                                                                      |
| <p>Articulate programme theory</p>                                                                   | <p>Develop a programme theory. The programme theory may draw on existing theories. Aspects of the programme theory can be represented by a logic model or set of models</p> <p>Test and refine the programme theory throughout the development process</p>                                                                                                                                                                                                                                                                                                                                                                                                                                                                                                                       |
| <p>Undertake primary data collection</p>                                                             | <p>Use a wide range of research methods throughout e.g. qualitative research to understand the context in which the intervention will operate, quantitative methods to measure change in intermediate outcomes</p>                                                                                                                                                                                                                                                                                                                                                                                                                                                                                                                                                               |
| <p>Understand context</p>                                                                            | <p>Understand the context in which the intervention will be implemented. Context may include population and individuals; physical location or geographical setting; social, economic, cultural and political influences; and factors affecting implementation e.g. organisation, funding, policy</p>                                                                                                                                                                                                                                                                                                                                                                                                                                                                             |

|                                                                              |                                                                                                                                                                                                                                                                                                                                                                                                                                                                                                                                                                                                                                                                                                                                              |
|------------------------------------------------------------------------------|----------------------------------------------------------------------------------------------------------------------------------------------------------------------------------------------------------------------------------------------------------------------------------------------------------------------------------------------------------------------------------------------------------------------------------------------------------------------------------------------------------------------------------------------------------------------------------------------------------------------------------------------------------------------------------------------------------------------------------------------|
| Pay attention to future implementation of the intervention in the real world | From the start, understand facilitators and barriers to reaching the relevant population, future use of the intervention, 'scale up' and sustainability in real world contexts                                                                                                                                                                                                                                                                                                                                                                                                                                                                                                                                                               |
| Design and refine the intervention                                           | <p>Generate ideas about content, format, and delivery with stakeholders</p> <p>Once an early version or prototype of the intervention is available, refine or optimise it using a series of iterations. Each iteration includes an assessment of how acceptable, feasible and engaging the intervention is, including potential harms and unintended consequences, resulting in refinements to the intervention. Repeat the process until uncertainties are resolved</p> <p>Check that the proposed mechanisms of action are supported by early testing</p>                                                                                                                                                                                  |
| End the development phase                                                    | <p>There are no established criteria for stopping the intensive development phase and moving on to the feasibility/pilot or evaluation phases. The concepts of data saturation and information power may be useful when assessment of later iterations of the intervention produces few changes</p> <p>Describe the intervention to facilitate transferability of an intervention outside the original team and location in which it was developed</p> <p>Write up the intervention development process so that judgements can be made about the quality of the process, links can be made in the future between intervention development processes and the subsequent success of interventions, and others can learn how it can be done</p> |

**Figure 1 Logic model for intervention development**



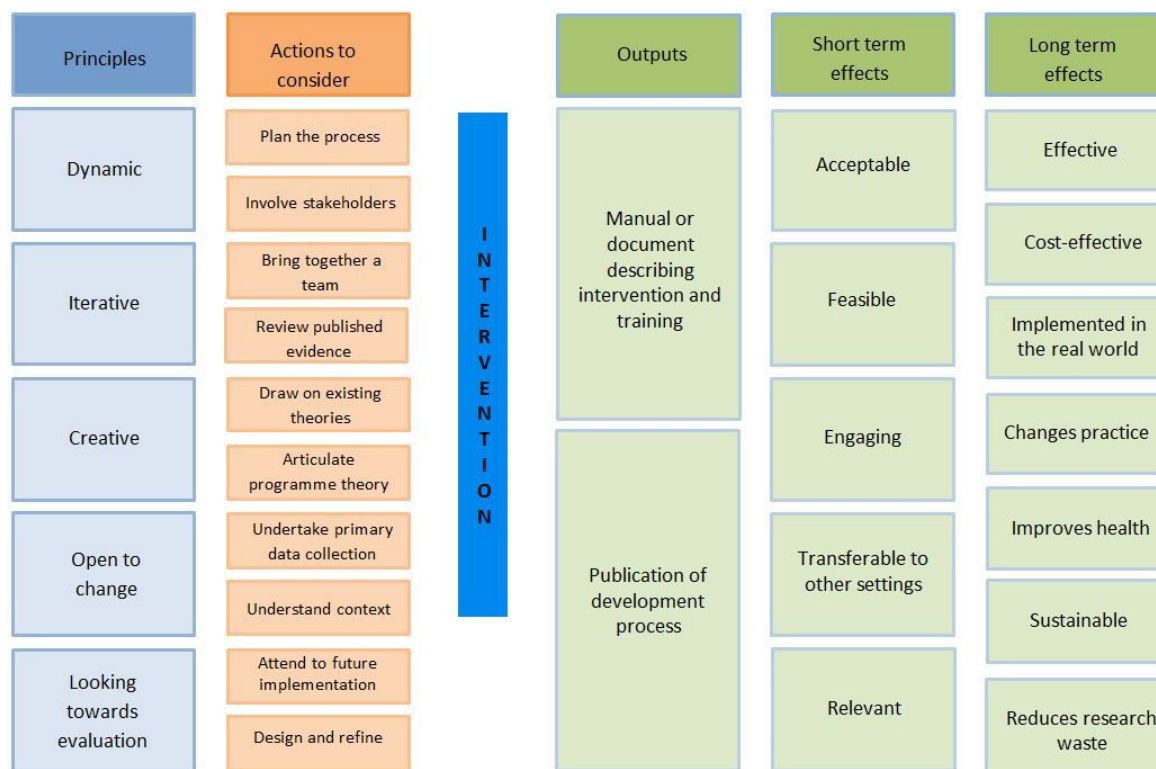

## Plan the development process

### Understand the problem

Developers usually start with a problem they want to solve. They may also have some initial ideas about the content, format or delivery of the proposed intervention. The knowledge about the problem and the possibilities for an intervention may be based on: personal experiences of the problem (patients, carers or members of the public); their work (practitioners, policy makers, researchers); published research or theory; or discussions with stakeholders. These early ideas about the intervention may be refined and indeed challenged throughout the intervention development process. For example, understanding the problem, priorities for addressing it, and the aspects that are amenable to change, is part of the development process, with different solutions emerging as understanding increases. In addition, developers may find that it is not necessary to develop a new intervention because effective or cost-effective ones already exist. It may not be worth developing a new intervention because the potential cost is likely to outweigh the potential benefits, or its limited reach could increase health inequalities, or the current context may not be conducive to using it. Health economists may contribute to this debate.

### Identify resources – time and funding

Once a decision has been made that a new intervention is necessary, and has the potential to be worthwhile, developers can consider the resources available to them. Spending too little time developing an intervention may result in a flawed intervention that is later found not to be effective or cost-effective or is not implemented in practice, resulting in research waste. Alternatively, spending too much time on development could also waste resources by leaving developers with an

1  
2  
3 outdated intervention that is no longer acceptable or feasible to deliver because the context has  
4 changed so much, or is no longer a priority. It is likely that a highly complex problem with a history of  
5 failed interventions will warrant more time for careful development.  
6

7  
8 Some funding bodies fund standalone intervention development studies or fund this endeavour as  
9 part of a programme of development, piloting and evaluation of an intervention. While pursuing  
10 such funding may be desirable to ensure sufficient resource, in practice some developers may need  
11 to fund various parts of the development process opportunistically by using small pots of money  
12 over a number of years.  
13

14 Applying for funding requires writing a protocol for a study. Funders need detail about the proposed  
15 intervention and the development process in order to make a funding decision. It may feel difficult  
16 to specify the intervention and the detail of its development before starting because these will  
17 depend on learning occurring throughout the development process. Developers can address this by  
18 describing in detail their best guess of the intervention and their planned development process,  
19 recognising that both are likely to change in practice. Even if funding is not sought, it may be a good  
20 idea to produce a protocol detailing the processes to be undertaken to develop the intervention so  
21 that sufficient resources can be identified.  
22  
23

#### 24 Decide which approach to intervention development to take

25  
26 A key decision for teams is whether to be guided by one of the many published approaches to  
27 intervention development, or undertake a more pragmatic self-selected set of actions. A published  
28 approach is a guide to the process and methods of intervention development set out in a book,  
29 website or journal article. The rationale for using a published approach is that it sets out systematic  
30 processes that other developers have found useful. Some published approaches, and approaches  
31 that developers have used in practice, are listed in Table 2.<sup>4 5</sup> No research has shown that one of  
32 these approaches is better than another, or that their use always leads to the development of  
33 successful interventions. In practice, developers may select a specific published approach because of  
34 the purpose of their intervention development, e.g. aiming to change behaviour might lead to the  
35 use of the Behaviour Change Wheel or Intervention Mapping, in conjunction with the Person Based  
36 Approach. Alternatively, selection may depend on developers' beliefs or values, e.g. partnership  
37 approaches such as co-production may be selected because developers believe that users will find  
38 the resultant interventions more acceptable and feasible, or they may value inclusive work practices  
39 in their own right. Although developers may follow a published approach closely, experts  
40 recommend that developers apply these approaches flexibly to fit their specific context.  
41  
42  
43  
44

45 **Table 2 Different approaches to intervention development**

46  
47

| Category                       | Definition                                                                                                                                                                                                              | Examples of approaches*                                                                                                                                                                             |
|--------------------------------|-------------------------------------------------------------------------------------------------------------------------------------------------------------------------------------------------------------------------|-----------------------------------------------------------------------------------------------------------------------------------------------------------------------------------------------------|
| 48 1.Partnership               | The people whom the intervention aims to help are involved in decision-making about the intervention throughout the development process, having at least equal decision-making powers with members of the research team | Co-production, co-creation, co-design; user-driven; Experience-based co-design (EBCD); Community Based Participatory Research                                                                       |
| 49 2.Target population-centred | Interventions are based on the views and actions of the people who will use the intervention                                                                                                                            | Person-based; User-centred; Human-centred design                                                                                                                                                    |
| 50 3.Theory and evidence-based | Interventions are based on combining published research evidence and existing theories e.g. psychological or organisational theories                                                                                    | MRC Framework for developing and evaluating complex interventions; Behaviour Change Wheel (BCW); Intervention mapping (IM); Normalisation Process Theory (NPT); Theoretical Domains Framework (TDF) |

51  
52  
53  
54  
55  
56  
57  
58  
59  
60

|                          |                                                                                                                                                         |                                                                                                                                               |
|--------------------------|---------------------------------------------------------------------------------------------------------------------------------------------------------|-----------------------------------------------------------------------------------------------------------------------------------------------|
| 4. Implementation-based  | Interventions are developed with attention to ensuring the intervention will be used in the real world if found to be effective at the evaluation phase | Reach, Effectiveness, Adoption, Implementation, Maintenance (RE-AIM)                                                                          |
| 5. Efficiency based      | Components of an intervention are tested using experimental designs to determine active components and make interventions more efficient                | Multiphase Optimization Strategy (MOST)                                                                                                       |
| 6. Stepped or phased     | Interventions are developed through emphasis on a systematic and sequential set of processes involved in intervention development                       | Six essential Steps for Quality Intervention Development (6SQUID); Five actions model; Obesity Related Behavioral Intervention Trials (ORBIT) |
| 7. Intervention-specific | An intervention development approach is constructed for a specific type of intervention                                                                 | Digital (e.g. Integrate, Design, Assess and Share (IDEAS)); Patient decision support aids                                                     |
| 8. Combination           | Published approaches to intervention development are combined                                                                                           | Participatory Action Research based on theories of Behaviour Change and Persuasive Technology (PAR –BCP)                                      |
| 9. Pragmatic             | Developers use a self-selected set of actions                                                                                                           | Sometimes framed as mixed methods or formative evaluation                                                                                     |

\*see <sup>4 5</sup> for references and examples

### Involve stakeholders throughout the development process

Many groups of people are likely to have a stake in the proposed intervention: the intervention may be aimed at patients or the public, or they may be expected to use the intervention; practitioners may deliver the intervention in a range of settings, e.g. hospitals, primary care, community care, social care, schools, communities, voluntary/third sector organisations; and users, policy makers or tax payers may pay for the intervention. The rationale for involving relevant stakeholders from the start, and indeed working closely with them throughout, is that they can help to identify priorities, understand the problem and help find solutions that may make a difference to future implementation in the real world.

There are many ways of working with stakeholders and different ways may be relevant for different stakeholders at different times during the development process. Consultation may sometimes be appropriate, where a one-off meeting with a set of stakeholders helps developers to understand the context of the problem or the context in which the intervention would operate. Alternatively, the intervention may be designed closely with stakeholders using a co-production process, where stakeholders and developers generate ideas about potential interventions and make decisions together throughout the development process about its content, format, style and delivery.<sup>13</sup> Stakeholders' views may also be obtained through qualitative interviews, surveys and stakeholder workshops, with methods tailored to the needs of each stakeholder. Innovative activities can be used to help engage stakeholders, for example creative sessions facilitated by a design specialist. As well as participating in developing the intervention, stakeholders can help to shape the intervention development process itself. Members of the public, patients and service users are key stakeholders and experts recommend planning to integrate their involvement into the intervention development process from the start.

### Bring together a team and establish decision making processes

Developers may choose to work within any size of team. Small teams can reach out to stakeholders at different points in the development process. Alternatively, large teams may include all the necessary expertise. Experts recommend including: experts in the problem to be addressed by the

1  
2  
3 intervention; individuals with a strong track record in developing complex interventions; a behaviour  
4 change scientist when the intervention aims to change behaviour; and people who are skilled at  
5 maximising engagement of stakeholders. Other possible team members include experts in  
6 evaluation methods and economics. Within a co-production approach to development, key  
7 stakeholders participate as equal partners with researchers. Large teams can generate ideas and  
8 ensure all the relevant skills are available but may also increase the risk of conflicting views and  
9 difficulties when making decisions about the final intervention. There is no consensus on the size of  
10 team to have, but experts think it is important to agree a process for making decisions. In particular,  
11 experts recommend that team members understand their roles, rights and responsibilities;  
12 document the reasons for decisions made; and are prepared to test different options where there  
13 are team disagreements.  
14  
15  
16

### 17 **Review published research evidence**

18  
19 Reviewing published research evidence before starting to develop an intervention can help to define  
20 the health problem and its determinants, understand the context in which the problem exists, clarify  
21 who the intervention should be aimed at, identify whether effective or cost-effective interventions  
22 already exist for the target population/ setting/problem, identify facilitators and barriers to  
23 delivering interventions in this context, and identify key uncertainties that need to be addressed  
24 using primary data collection. Continuing to review evidence throughout the process can help to  
25 address uncertainties that arise, for example if a new substantive intervention component is  
26 proposed then the research evidence about it can be explored. Evidence can change quickly, and  
27 keeping up with it by reviewing literature can alert developers to new relevant interventions that  
28 have been found to be effective or cost effective. Developers may be tempted to look for evidence  
29 that supports existing ideas and plans, but should also look for, and take into account, evidence that  
30 the proposed intervention may not work in the way intended. Undertaking systematic reviews is not  
31 always necessary because there may be recent relevant reviews available. Nor is it always possible in  
32 the context of tight resources available to the development team. However undertaking some  
33 review is important for ensuring that there are no existing interventions that would make the one  
34 under development redundant.  
35  
36  
37  
38

### 39 **Draw on existing theories**

40  
41 Some developers call their approaches to intervention development 'theory based' when they draw  
42 on psychological, sociological, organisational or implementation theories, or frameworks of theories,  
43 to inform their intervention.<sup>45</sup> The rationale for drawing on existing theories is that they can help to  
44 identify what is important, relevant and feasible to inform the intended goals of the intervention,<sup>14</sup>  
45 and inform the content and delivery of any intervention. It may be relevant to draw on more than  
46 one existing theory. Experts recommend considering which theories are relevant at the start of the  
47 development process. However, the utility of theories may need to be kept under scrutiny since in  
48 practice some developers have found that their selected theory proved difficult to apply during the  
49 development process.  
50  
51

### 52 **Articulate programme theory**

53  
54 A programme theory describes how a specific intervention is expected to lead to its effects and  
55 under what conditions.<sup>14</sup> It shows the causal pathways between the content of the intervention,  
56 intermediate outcomes and long term goals, and how these interact with contextual factors.  
57 Articulating programme theory at the start of the development process can help to communicate to  
58 funding agencies and stakeholders how the intervention will work. Existing theories may inform this  
59  
60

1  
2  
3 programme theory. Logic models can be drawn to communicate different parts of the programme  
4 theory such as the causes of a problem, or the mechanisms by which an intervention will achieve  
5 outcomes, to both team members and external stakeholders. Figure 1 is an example of a logic  
6 model. The programme theory and logic models are not static. They should be tested and refined  
7 throughout the development process using primary and secondary data collection and stakeholder  
8 input.  
9

### 10 11 **Undertake primary data collection**

12  
13 Primary data collection, usually involving mixed methods, can be used for a range of purposes  
14 throughout the intervention development process. Reviewing the evidence base may identify key  
15 uncertainties that primary data collection can then address. Non-participant observation can be  
16 used to understand the setting in which the intervention will be used. Qualitative interviews with  
17 the target population or patient group can identify what matters most to people, their lived  
18 experience, or why people behave as they do. 'Verbal protocol', which involves users of an  
19 intervention talking aloud about it as they use it,<sup>15</sup> can be undertaken to understand the usability of  
20 early versions of the intervention. Pre-test post-test measures may be taken of intermediate  
21 outcomes to begin early testing of some aspects of the programme theory, an activity that will  
22 continue into the feasibility and evaluation phases of the MRC framework and may lead to changes  
23 to the programme theory. Surveys, discrete choice experiments, or qualitative interviews can be  
24 used to assess the acceptability, values and priorities of those delivering and receiving the  
25 intervention.  
26  
27  
28

### 29 **Understand the context**

30  
31 Recent guidance on context in population health intervention research identifies a breadth of  
32 features including those relating to population and individuals; physical location or geographical  
33 setting; social, economic, cultural and political influences; and factors affecting implementation, e.g.  
34 organisation, funding, policy.<sup>16</sup> An important context is the specific setting in which the intervention  
35 will be used, for example within a busy emergency department or within people's homes. The rationale  
36 for understanding this context, and developing interventions which can operate within it, is to avoid  
37 developing interventions that fail during later evaluation because too few people deliver or use  
38 them. Context also includes the wider complex health and social care, societal or political systems  
39 within which any intervention will operate.<sup>17</sup> Different approaches can be taken to understand  
40 context, including reviews of evidence, stakeholder engagement and primary data collection. A  
41 challenge of understanding context is that it may change rapidly over the course of the development  
42 process.  
43  
44  
45

### 46 **Pay attention to future implementation of the intervention in the real world**

47  
48 The end goal of developers or those who fund development is real-world implementation rather  
49 than simply the development of an intervention that is shown to be effective or cost-effective in a  
50 future evaluation.<sup>6</sup> Many interventions do not lead to change in policy or practice, and it is  
51 important that effective interventions inform policy and are eventually used in the real world to  
52 improve health and care. To achieve this goal, developers may pay attention early on in the  
53 development process to factors that might affect use of the intervention, 'scale up' of the  
54 intervention for use nationally or internationally, and sustainability. For example, consideration of  
55 the cost of the intervention at an early stage, or including as stakeholders official bodies or policy  
56 makers that would endorse or accredit the intervention, may help its future implementation.  
57  
58  
59

### 60 **Design and refine the intervention**

1  
2  
3 The term 'design' is sometimes used interchangeably with the term 'development'. However, it is  
4 useful to see design as a specific creative part of the development process where ideas are  
5 generated, and decisions are made about the intervention components and how it will be delivered,  
6 by whom, and where. Design starts with generation of ideas about the content, format, style and  
7 delivery of the proposed intervention. The process of design may use creative ways of generating  
8 ideas, for example using games or physically making rough prototypes. Some teams include experts  
9 in design or use designers external to the team when undertaking this action. The rationale for a  
10 wide-ranging and creative design process is to identify innovative and workable ideas that may not  
11 otherwise have been considered.  
12  
13

14  
15 After generating ideas, a mock up or prototype of the intervention or a key component may be  
16 created to allow stakeholders to offer views on it. Once an early version or prototype of the  
17 intervention is available, it can be refined (sometimes called optimised) using a series of rapid  
18 iterations where each iteration includes an assessment of how acceptable, feasible and engaging the  
19 intervention is, leading to cycles of refinements. The programme theory and logic models are  
20 important at this point and developers may test whether some of their proposed mechanisms of  
21 action are impacting on intermediate outcomes if statistical power allows. The rationale for  
22 spending time on multiple iterations is that problems can be identified and solutions found prior to  
23 any expensive future feasibility or evaluation phase. Some experts take a quantitative approach to  
24 optimisation of an intervention, specifically the Multiphase Optimization Strategy (MOST) in Table 2,  
25 but not all experts agree that this is necessary.  
26  
27

### 28 **End the development phase**

29  
30 Seeing this endeavour as a discrete 'intervention development phase' that comes to an end may feel  
31 artificial. In practice there is overlap between some actions taken in the development phase and the  
32 feasibility phase of the MRC framework,<sup>1</sup> such as consideration of acceptability and some  
33 measurement of change in intermediate outcomes. Developers may return to the intervention  
34 development phase if findings from the feasibility phase identify significant problems with the  
35 intervention. In many ways, development never stops because developers will continue to learn  
36 about the intervention, and refine it, during the later pilot/feasibility, evaluation and  
37 implementation phases. The intention may be that some types of intervention continuously evolve  
38 during evaluation and implementation, which may reduce the amount of time spent on the  
39 development phase. However, developers need to decide when to stop that first intensive  
40 development phase, either in terms of abandoning the intervention because pursuing it is likely to  
41 be futile, or moving on to the next phase of feasibility/piloting testing or full evaluation. They also  
42 face the challenge of convincing potential funders of an evaluation that enough development has  
43 occurred to risk spending resources on its pilot or evaluation. The decision to end the development  
44 phase may be partly informed by practicalities, such as the amount of time and money available, and  
45 partly by the concepts of data saturation and information power (used in qualitative research) in  
46 that the intensive process stops when few refinements are suggested by those delivering or using  
47 the intervention during its period of refinement.  
48  
49  
50  
51  
52

53 At the end of the development process, policy makers, developers or service providers external to  
54 the original team may want to implement or evaluate the intervention. Describing the intervention,  
55 using the TIDieR (Template for Intervention Description and Replication) Checklist,<sup>18</sup> and producing a  
56 manual or document that describes the training as well as content of the intervention, can facilitate  
57 this. This information can be made available on a website, and, for some digital interventions, the  
58 intervention itself can be made available. It is helpful to publish the intervention development  
59 process because it allows others to make links in the future between intervention development  
60

1  
2  
3 processes and the subsequent success of interventions, and learn about intervention development  
4 endeavours. Publishing failed attempts to develop an intervention, as well as those that produce an  
5 intervention, may help to reduce research waste. Reporting multiple, iterative and interacting  
6 processes in these articles is challenging, particularly in the context of limited word count for some  
7 journals. It may be necessary to publish more than one paper to describe the development if  
8 multiple lessons have been learnt for future development studies.  
9  
10

## 11 12 13 **Conclusions**

14  
15 This guidance on intervention development presents a set of principles and actions for future  
16 developers to consider throughout the development process. There is insufficient research evidence  
17 to recommend that a particular published approach or set of actions is essential to produce a  
18 successful intervention. Some aspects of the guidance may not be relevant to some interventions or  
19 contexts, and not all developers are fortunate enough to have a large amount of resource available  
20 to them, so a flexible approach to using the guidance is required. The best way to use the guidance is  
21 to consider each action by addressing its relevance to a specific intervention in a specific context,  
22 both at the start and throughout the development process.  
23  
24  
25  
26  
27  
28

29 **Contributors:** AOC and PH led the development of the guidance, wrote the first draft of the article,  
30 and the full guidance document which it describes, and integrated contributions from the author  
31 group into subsequent drafts. All authors contributed to the design and content of the guidance and  
32 subsequent drafts of the paper. The guidance is based on reviews and primary research. AOC led the  
33 review of different approaches to intervention development working with KS. LC led the review of  
34 primary research working with KS. PH led the qualitative interview study working with NR, KT and  
35 ED. ED led the consensus exercise working with NR. AOC acts as guarantor.  
36  
37  
38  
39

40 **Funding:** MRC-NIHR Methodology Research Panel (MR/N015339/1). Funders had no influence on  
41 the guidance presented here. The authors were fully independent of the funders.  
42

43 **Competing interests:** All authors have read and understood BMJ Group policy on declaration of  
44 interests and have no relevant interests to declare.  
45

46 **Acknowledgements:** This guidance is based on secondary and primary research. Many thanks to  
47 participants in the e-Delphis, consensus conference and qualitative interviews; to members of our  
48 Expert Panel; and to people who attended workshops discussing this guidance. The researchers  
49 leading the update of the MRC guidance on developing and evaluating interventions, due to be  
50 published later this year, also offered insightful comments on our guidance to facilitate fit between  
51 the two sets of guidance.  
52  
53  
54  
55

## 56 **References**

- 57  
58 1. Craig P, Dieppe P, Macintyre S, et al. Developing and evaluating complex interventions: the new  
59 Medical Research Council guidance. *BMJ* 2008;337:a1655. doi: 10.1136/bmj.a1655  
60

2. Edwardson C, Yates T, Biddle S, et al. Effectiveness of the Stand More AT (SMArT) Work intervention: cluster randomised controlled trial. *BMJ* 2018;363:k3870. doi: 10.1136/bmj.k3870
3. Hoddinott P. A new era for intervention development studies. *Pilot Feasibility Stud* 2015;1(36):1-4. doi: 10.1186/s40814-015-0032-0
4. O’Cathain A, Croot L, Sworn K, et al. Taxonomy and synthesis of approaches to developing interventions to improve health: a systematic methods overview. *Pilot Feasibility Stud (in press)*
6. Turner K, Rousseau N, O’Cathain A, et al. Successful intervention development and its drivers: a qualitative interview study. *BMJ Open (under review)*
7. Garba R, Gadanya M. The role of intervention mapping in designing disease prevention interventions: A systematic review of the literature. *PLoS One* 2017;12(3):e0174438. doi: 10.1371/journal.pone.0174438
8. Clarke D, Jones F, Harris R, et al. What outcomes are associated with developing and implementing co-produced interventions in acute healthcare settings? A rapid evidence synthesis. *BMJ Open* 2017;7(7):e014650. doi: 10.1136/bmjopen-2016-014650
9. Voorberg W, Bekkers V, Tummers L. A Systematic Review of Co-Creation and Co-Production: Embarking on the social innovation journey. *Public Management Journal* 2015;17(9):1333-57. doi: 10.1080/14719037.2014.930505
10. Conn V, Enriquez M, Ruppar T, et al. Meta-analyses of Theory Use in Medication Adherence Intervention Research. *Am J Health Behav* 2016;40(2):155-71. doi: 10.5993/ajhb.40.2.1
11. Prestwich A, Sniehotta F, Whittington C, et al. Does theory influence the effectiveness of health behavior interventions? . *Health Psychol* 2014;33(5):465-74. doi: 10.1037/a0032853
12. W K Kellogg Foundation. *Logic Model Development Guide*, 2004 Available from: <https://www.bttop.org/sites/default/files/public/W.K.%20Kellogg%20LogicModel.pdf> [Access Date 30.11.2018].
13. INVOLVE. *Guidance on co-producing a research project*, 2018 Available from: [http://www.invo.org.uk/wp-content/uploads/2018/03/Copro\\_Guidance\\_Mar18.pdf](http://www.invo.org.uk/wp-content/uploads/2018/03/Copro_Guidance_Mar18.pdf) [Access Date 30.11.2018].
14. Davidoff F, Dixon-Woods M, Leviton L, et al. Demystifying theory and its use in improvement. *BMJ Qual Saf* 2015;24(3):228-38. doi: 1136/bmjqs-2014-003627
15. Fonteyn M, Kuipers B, Grobe S. A Description of Think Aloud Method and Protocol Analysis. *Qual Health Res* 1993;3(4):430-41. doi: 10.1177/10497323930030
16. Craig P, Di Ruggiero E, Frohlich K, et al. Taking account of context in population health intervention research: guidance for producers, users and funders of research. Southampton: NIHR Evaluation, Trials and Studies Coordinating Centre 2018.
17. Moore G, Evans R, Hawkins J, et al. From complex social interventions to interventions in complex social systems: Future directions and unresolved questions for intervention development and evaluation. *Evaluation* 2018;25(1):23-45. doi: 10.1177/1356389018803219
18. Hoffmann T, Glasziou P, Boutron I, et al. Better reporting of interventions: template for intervention description and replication (TIDieR) checklist and guide. *BMJ* 2014;348:g1687. doi: 10.1136/bmj.g1687



1  
2  
3  
4  
5  
6  
7  
8  
9  
10  
11  
12  
13  
14  
15  
16  
17  
18  
19  
20  
21  
22  
23  
24  
25  
26  
27  
28  
29  
30  
31  
32  
33  
34  
35  
36  
37  
38  
39  
40  
41  
42  
43  
44  
45  
46  
47  
48  
49  
50  
51  
52  
53  
54  
55  
56  
57  
58  
59  
60

For peer review only

# BMJ Open

## Guidance on how to develop complex interventions to improve health and health care

|                                 |                                                                                                                                                                                                                                                                                                                                                                                                                                                                                                                                                                                                                                                          |
|---------------------------------|----------------------------------------------------------------------------------------------------------------------------------------------------------------------------------------------------------------------------------------------------------------------------------------------------------------------------------------------------------------------------------------------------------------------------------------------------------------------------------------------------------------------------------------------------------------------------------------------------------------------------------------------------------|
| Journal:                        | <i>BMJ Open</i>                                                                                                                                                                                                                                                                                                                                                                                                                                                                                                                                                                                                                                          |
| Manuscript ID                   | bmjopen-2019-029954.R2                                                                                                                                                                                                                                                                                                                                                                                                                                                                                                                                                                                                                                   |
| Article Type:                   | Communication                                                                                                                                                                                                                                                                                                                                                                                                                                                                                                                                                                                                                                            |
| Date Submitted by the Author:   | 13-May-2019                                                                                                                                                                                                                                                                                                                                                                                                                                                                                                                                                                                                                                              |
| Complete List of Authors:       | O'Cathain, Alicia; University of Sheffield School of Health and Related Research<br>Croot, Liz; University of Sheffield, MCRU,SCHARR<br>Duncan, Edward; University of Stirling<br>Rousseau, Nikki; University of Stirling<br>Sworn, Katie; University of Sheffield, Health Economics and Decision Science, School of Health and Related Research<br>Turner, Katrina; University of Bristol, School of Social and Community Medicine<br>Yardley, Lucy; University of Southampton, Psychology; University of Bristol, School of Health Sciences<br>Hoddinott, Pat; University of Stirling, Nursing, Midwifery and Allied Health Professional Research Unit |
| <b>Primary Subject Heading</b>: | Health services research                                                                                                                                                                                                                                                                                                                                                                                                                                                                                                                                                                                                                                 |
| Secondary Subject Heading:      | Public health                                                                                                                                                                                                                                                                                                                                                                                                                                                                                                                                                                                                                                            |
| Keywords:                       | intervention development, guidance, health                                                                                                                                                                                                                                                                                                                                                                                                                                                                                                                                                                                                               |
|                                 |                                                                                                                                                                                                                                                                                                                                                                                                                                                                                                                                                                                                                                                          |

SCHOLARONE™  
Manuscripts

### **Guidance on how to develop complex interventions to improve health and health care**

\*Alicia O’Cathain University of Sheffield School of Health and Related Research, Sheffield, UK,  
Professor

Liz Croot, School of Health and Related Research (SchARR), University of Sheffield, Senior Research  
Fellow

Ed Duncan, NMAHP Research Unit, University of Stirling, Associate Professor

Nikki Rousseau NMAHP Research Unit, University of Stirling, Research Fellow

Katie Sworn, School of Health and Related Research (SchARR), University of Sheffield, Research  
Associate

Katrina Turner, Population Health Sciences, University of Bristol, Reader

Lucy Yardley, School of Psychological Sciences, University of Bristol, Professor

Pat Hoddinott, NMAHP Research Unit, University of Stirling, Professor

\*Corresponding author: a.ocathain@sheffield.ac.uk

The Corresponding Author has the right to grant on behalf of all authors and does grant on behalf of all authors, an exclusive licence on a worldwide basis to the BMJ Publishing Group Ltd to permit this article (if accepted) to be published in BMJ editions and any other BMJ PGL products and sublicences such use and exploit all subsidiary rights, as set out in our licence.

All authors have completed the Unified Competing Interest form (available on request from the corresponding author) and declare: financial support from Medical Research Council and NIHR for this study; no financial relationships with any organisations that might have an interest in the submitted work in the previous three years, no other relationships or activities that could appear to have influenced the submitted work.

## Abstract

Objective: To provide researchers with guidance on actions to take during intervention development.

Summary of key points: Based on a consensus exercise informed by reviews and qualitative interviews, we present key principles and actions for consideration when developing interventions to improve health. These include seeing intervention development as a dynamic iterative process, involving stakeholders, reviewing published research evidence, drawing on existing theories, articulating programme theory, undertaking primary data collection, understanding context, paying attention to future implementation in the real world, and designing and refining an intervention using iterative cycles of development with stakeholder input throughout.

Conclusion: Researchers should consider each action by addressing its relevance to a specific intervention in a specific context, both at the start and throughout the development process.

## Introduction

There is increasing demand for new interventions as policymakers and clinicians grapple with complex challenges, such as integration of health and social care, risk associated with lifestyle behaviours, multi-morbidity and the use of e-health technology. Complex interventions are often required to address these challenges. Complex interventions can have a number of interacting components, require new behaviours by those delivering or receiving the intervention, or have a variety of outcomes.[1] An example is a multicomponent intervention to help people stand more at work, including a height adjustable workstation, posters, and coaching sessions.[2] Careful development of complex interventions is necessary so that new interventions have a better chance of being effective when evaluated, and being adopted widely in the real world. Researchers, the public, patients, industry, charities, care providers including clinicians, and policy makers can all be involved in the development of new interventions to improve health, and all have an interest in how best to do this.

The United Kingdom Medical Research Council (UK MRC) published influential guidance on developing and evaluating complex interventions, presenting a framework of four phases: development, feasibility/piloting, evaluation, and implementation.[1] The development phase is what happens between the idea for an intervention and formal pilot testing in the next phase.[3] This phase was only briefly outlined in the original MRC guidance and requires extension to offer more help to researchers wanting to develop complex interventions. Bleijenberg and colleagues (2018) brought together learning from a range of guides/published approaches to intervention development to enrich the MRC framework.[4] There are also multiple sources of guidance to intervention development, embodied in books and journal articles about different approaches to intervention development (for example[5]), and overviews of the different approaches.[6] These approaches and overviews may offer conflicting advice and it is timely to gain consensus on key aspects of intervention development to help researchers to focus on this endeavour. Here we present guidance on intervention development based on a consensus study which we describe below. We present this guidance as an accessible communication article on how to do intervention development, which is aimed at readers who are developers, including those new to the endeavour. We do not present it as a "Research Article" with methods and findings in order to maximise its

1  
2  
3 utility as guidance. Lengthy detail and a long list of references are not provided so that the guidance  
4 is focused and user friendly. In addition, the key actions of intervention development are  
5 summarised in a single table so that funding panel members and developers can use this as a quick  
6 reference point of issues to consider when developing health interventions.  
7

### 8 **How this guidance was developed**

9  
10 This guidance is based on a study funded by the MRC and the National Institute for Health Research  
11 in the UK, with triangulation of evidence from three sources. First, we undertook a review of  
12 published approaches to intervention development that offer developers guidance on specific ways  
13 to develop interventions,[6] and a review of primary research reporting intervention development.  
14 The next two phases involved developers and wider stakeholders. Developers were people who had  
15 written articles or books detailing different approaches to developing interventions, and people who  
16 had developed interventions. Wider stakeholders were people involved in the wider intervention  
17 development endeavour in terms of being directors of research funding panels, editors of journals  
18 that had published intervention development studies, people who had been public and patient  
19 involvement members of studies involving intervention development, and people working in health  
20 service implementation. We carried out qualitative interviews [7] and then we conducted a  
21 consensus exercise consisting of two simultaneous and identical e-Delphi studies distributed to  
22 intervention developers and wider stakeholders respectively, and followed this with a consensus  
23 workshop. We generated items for the e-Delphi studies based on our earlier reviews and analysis of  
24 interview data and asked participants to rate 85 items on a five point scale from 'very' to 'not  
25 important' using the question 'when developing complex interventions to improve health, how  
26 important is it to'. The distribution of answers to each item is displayed in Appendix 1. In addition to  
27 these research methods we convened an international expert panel with members from the UK,  
28 United States of America and Europe early in the project to guide the research. Members of this  
29 expert panel participated in the e-Delphi studies and consensus workshop alongside other  
30 participants.  
31

### 32 **Framework for intervention development**

33  
34 We base this guidance on expert opinion because there is a research evidence gap about which  
35 actions are needed in intervention development to produce successful health interventions.  
36 Systematic reviews have been undertaken to determine whether following a specific published  
37 approach, or undertaking a specific action, results in effective interventions. Unfortunately this  
38 evidence base is sparse in the field of health, largely due to the difficulty of empirically addressing  
39 this question.[8,9] Evidence tends to focus on the use of existing theory within intervention  
40 development – for example the theory of Diffusion of Innovation, or theories on behaviour change -  
41 and a review of reviews shows that interventions developed with existing theory do not result in  
42 more effective intervention than those not using existing theory.[10] The authors of this latter  
43 review highlight problems with the evidence base rather than dismiss the possibility that existing  
44 theory could help produce successful interventions.  
45

46  
47 Key principles and actions of intervention development are summarised below. More detailed  
48 guidance for the principles and actions is available at  
49 <https://www.sheffield.ac.uk/scharr/sections/hsr/mcru/indexstudy>.  
50

#### 51 Key principles of intervention development

52  
53 Key principles of intervention development are that it is dynamic, iterative, creative, open to change,  
54 and forward looking to future evaluation and implementation. Developers are likely to move  
55  
56  
57  
58  
59  
60

backwards and forwards dynamically between overlapping actions within intervention development, such as reviewing evidence, drawing on existing theory and working with stakeholders. There will also be iterative cycles of developing a version of the intervention: getting feedback from stakeholders to identify problems, implementing potential solutions, assessing their acceptability, and starting the cycle again until assessment of later iterations of the intervention produces few changes. These cycles will involve using quantitative and qualitative research methods to measure processes and intermediate outcomes, and assess the acceptability, feasibility, desirability and potential unintended harms of the intervention.

Developers may start the intervention development with strong beliefs about the need for the intervention, its content or format, or how it should be delivered. They may also believe that it is possible to develop an intervention with a good chance of being effective, or that it can only do good not harm. Being open to alternative possibilities throughout the development process may lead to abandoning the endeavour or taking steps back as well as forward. The rationale for being open to change is that this may reduce the possibility of developing an intervention that fails during future evaluation or is never implemented in practice. Developers may also benefit from looking forward to how the intervention will be evaluated so they can make plans for this, and identify learning and key uncertainties to be addressed in future evaluation.

#### Key actions of intervention development

Key actions for developers to consider are summarised in Table 1 and explored in more detail throughout the rest of the paper. It may not be possible or desirable for developers to address all these actions during their development process, and indeed some may not be relevant to every problem or context. The recommendation made here is that developers *consider the relevance and importance of these actions to their situation both at the start of, and throughout, the development process.*

These key actions are set out in Table 1 in what appears to be a sequence. However, in practice these actions are addressed in a dynamic way. That is, undertaken in parallel and revisited regularly as the intervention evolves, or they interact with each other when learning from one action influences plans for other actions. These actions are explored in more detail below and presented in a logic model for intervention development (Figure 1). A logic model is a diagram of how an intervention is proposed to work, showing mechanisms by which an intervention influences the proposed outcomes.[11] The short and long term effects of successful intervention development were informed by the qualitative interviews with developers and wider stakeholders.[7]

**Table 1 Framework of actions for intervention development**

| Action                       | Consider the relevance and importance of the following...                                                                                                                                                     |
|------------------------------|---------------------------------------------------------------------------------------------------------------------------------------------------------------------------------------------------------------|
| Plan the development process | Identify the problem to be targeted and refine understanding of it throughout the process<br><br>Assess whether the problem is a priority<br><br>Consider which aspects of the problem are amenable to change |

|                                                                                               |                                                                                                                                                                                                                                                                                                                                                                                                                                                                                                                                                                                                                                                                                                                                                                                  |
|-----------------------------------------------------------------------------------------------|----------------------------------------------------------------------------------------------------------------------------------------------------------------------------------------------------------------------------------------------------------------------------------------------------------------------------------------------------------------------------------------------------------------------------------------------------------------------------------------------------------------------------------------------------------------------------------------------------------------------------------------------------------------------------------------------------------------------------------------------------------------------------------|
|                                                                                               | <p>Ask whether a new intervention is really needed and if the potential benefit of the new intervention justifies the cost of development</p> <p>Determine the time needed to undertake intervention development</p> <p>Obtain sufficient resources/funding for the intervention development study</p> <p>Draw on one or more of the many published intervention development approaches, recognising that there is no evidence about which approach is best, and apply flexibly depending on the problem and context</p> <p>Involve stakeholders during the planning process (see next Action)</p> <p>Produce a protocol detailing the processes to be undertaken to develop the intervention</p>                                                                                |
| Involve stakeholders, including those who will deliver, use and benefit from the intervention | <p>Work closely with relevant stakeholders throughout the development process: patients, the public, the target population, service providers, those who pay for health and social services or interventions, policy makers, and intervention design specialists</p> <p>Develop a plan at the start of the process to integrate public and patient involvement into the intervention development process</p> <p>Identify the best ways of working with each type of stakeholder, from consultation through to co-production, acknowledging that different ways may be relevant for different stakeholders at different times</p> <p>Use creative activities within team meetings to work with stakeholders to understand the problem and generate ideas for the intervention</p> |
| Bring together a team and establish decision making processes                                 | <p>Include within the development team individuals with relevant expertise: in the problem to be addressed by the intervention including those with personal experience of the problem, in behaviour change when the intervention aims to change behaviour, in maximising engagement of stakeholders, and with a strong track record in designing complex interventions</p> <p>It may be hard to make final decisions about the content, format and delivery of the intervention, so only some team members may do this. There is no consensus about the size or constituency of the team that makes these final decisions, but it is important early on to agree a process for making decisions within the team</p>                                                             |
| Review published research evidence                                                            | <p>Review published research evidence before starting to develop the intervention and throughout the development process e.g. to identify existing interventions, to understand the evidence base for each proposed substantive intervention component</p> <p>Look for, and take into account, evidence that the proposed intervention may not work in the way intended</p>                                                                                                                                                                                                                                                                                                                                                                                                      |
| Draw on existing theories                                                                     | <p>Identify an existing theory or framework of theories to inform the intervention at the start of the process e.g. behaviour change or implementation theory</p>                                                                                                                                                                                                                                                                                                                                                                                                                                                                                                                                                                                                                |

|                                                                              |                                                                                                                                                                                                                                                                                                                                                                                                                                                                                                                                                                                                                                                                                                                                       |
|------------------------------------------------------------------------------|---------------------------------------------------------------------------------------------------------------------------------------------------------------------------------------------------------------------------------------------------------------------------------------------------------------------------------------------------------------------------------------------------------------------------------------------------------------------------------------------------------------------------------------------------------------------------------------------------------------------------------------------------------------------------------------------------------------------------------------|
|                                                                              | Where relevant, draw on more than one existing theory or framework of theories e.g. both psychological and organisational theories                                                                                                                                                                                                                                                                                                                                                                                                                                                                                                                                                                                                    |
| Articulate programme theory                                                  | Develop a programme theory. The programme theory may draw on existing theories. Aspects of the programme theory can be represented by a logic model or set of models<br><br>Test and refine the programme theory throughout the development process                                                                                                                                                                                                                                                                                                                                                                                                                                                                                   |
| Undertake primary data collection                                            | Use a wide range of research methods throughout e.g. qualitative research to understand the context in which the intervention will operate, quantitative methods to measure change in intermediate outcomes                                                                                                                                                                                                                                                                                                                                                                                                                                                                                                                           |
| Understand context                                                           | Understand the context in which the intervention will be implemented. Context may include population and individuals; physical location or geographical setting; social, economic, cultural and political influences; and factors affecting implementation e.g. organisation, funding, policy                                                                                                                                                                                                                                                                                                                                                                                                                                         |
| Pay attention to future implementation of the intervention in the real world | From the start, understand facilitators and barriers to reaching the relevant population, future use of the intervention, 'scale up' and sustainability in real world contexts                                                                                                                                                                                                                                                                                                                                                                                                                                                                                                                                                        |
| Design and refine the intervention                                           | Generate ideas about content, format, and delivery with stakeholders<br><br>Once an early version or prototype of the intervention is available, refine or optimise it using a series of iterations. Each iteration includes an assessment of how acceptable, feasible and engaging the intervention is, including potential harms and unintended consequences, resulting in refinements to the intervention. Repeat the process until uncertainties are resolved<br><br>Check that the proposed mechanisms of action are supported by early testing                                                                                                                                                                                  |
| End the development phase                                                    | There are no established criteria for stopping the intensive development phase and moving on to the feasibility/pilot or evaluation phases. The concepts of data saturation and information power may be useful when assessment of later iterations of the intervention produces few changes<br><br>Describe the intervention to facilitate transferability of an intervention outside the original team and location in which it was developed<br><br>Write up the intervention development process so that judgements can be made about the quality of the process, links can be made in the future between intervention development processes and the subsequent success of interventions, and others can learn how it can be done |

**Figure 1 Logic model for intervention development – insert here**

**Plan the development process**

Understand the problem



1  
2  
3 Developers usually start with a problem they want to solve. They may also have some initial ideas  
4 about the content, format or delivery of the proposed intervention. The knowledge about the  
5 problem and the possibilities for an intervention may be based on: personal experiences of the  
6 problem (patients, carers or members of the public); their work (practitioners, policy makers,  
7 researchers); published research or theory; or discussions with stakeholders. These early ideas about  
8 the intervention may be refined and indeed challenged throughout the intervention development  
9 process. For example, understanding the problem, priorities for addressing it, and the aspects that  
10 are amenable to change, is part of the development process, with different solutions emerging as  
11 understanding increases. In addition, developers may find that it is not necessary to develop a new  
12 intervention because effective or cost-effective ones already exist. It may not be worth developing a  
13 new intervention because the potential cost is likely to outweigh the potential benefits, or its limited  
14 reach could increase health inequalities, or the current context may not be conducive to using it.  
15 Health economists may contribute to this debate.  
16  
17  
18  
19  
20

### 21 Identify resources – time and funding

22  
23 Once a decision has been made that a new intervention is necessary, and has the potential to be  
24 worthwhile, developers can consider the resources available to them. Spending too little time  
25 developing an intervention may result in a flawed intervention that is later found not to be effective  
26 or cost-effective or is not implemented in practice, resulting in research waste. Alternatively,  
27 spending too much time on development could also waste resources by leaving developers with an  
28 outdated intervention that is no longer acceptable or feasible to deliver because the context has  
29 changed so much, or is no longer a priority. It is likely that a highly complex problem with a history of  
30 failed interventions will warrant more time for careful development.  
31  
32

33 Some funding bodies fund standalone intervention development studies or fund this endeavour as  
34 part of a programme of development, piloting and evaluation of an intervention. While pursuing  
35 such funding may be desirable to ensure sufficient resource, in practice some developers may not be  
36 able to access this funding and may have to fund different parts of the development process from  
37 separate pots of money over a number of years.  
38  
39

40 Applying for funding requires writing a protocol for a study. Funders need detail about the proposed  
41 intervention and the development process in order to make a funding decision. It may feel difficult  
42 to specify the intervention and the detail of its development before starting because these will  
43 depend on learning occurring throughout the development process. Developers can address this by  
44 describing in detail their best guess of the intervention and their planned development process,  
45 recognising that both are likely to change in practice. Even if funding is not sought, it may be a good  
46 idea to produce a protocol detailing the processes to be undertaken to develop the intervention so  
47 that sufficient resources can be identified.  
48  
49

### 50 Decide which approach to intervention development to take

51  
52 A key decision for teams is whether to be guided by one of the many published approaches to  
53 intervention development, or undertake a more pragmatic self-selected set of actions. A published  
54 approach is a guide to the process and methods of intervention development set out in a book,  
55 website or journal article. The rationale for using a published approach is that it sets out systematic  
56 processes that other developers have found useful. Some published approaches, and approaches  
57 that developers have used in practice, are listed in Table 2.[6] No research has shown that one of  
58 these approaches is better than another, or that their use always leads to the development of  
59  
60

successful interventions. In practice, developers may select a specific published approach because of the purpose of their intervention development, e.g. aiming to change behaviour might lead to the use of the Behaviour Change Wheel or Intervention Mapping, in conjunction with the Person Based Approach. Alternatively, selection may depend on developers' beliefs or values, e.g. partnership approaches such as co-production may be selected because developers believe that users will find the resultant interventions more acceptable and feasible, or they may value inclusive work practices in their own right. Although developers may follow a published approach closely, experts recommend that developers apply these approaches flexibly to fit their specific context. Many of these approaches share the same actions [4,6] and simply place more emphasis on one or a sub-set of actions. Researchers sometimes combine the use of different approaches in practice to gain the strengths of two approaches, as in the 'Combination' category of Table 2.

**Table 2 Different approaches to intervention development**

| Category                    | Definition                                                                                                                                                                                                              | Examples of approaches*                                                                                                                                                                             |
|-----------------------------|-------------------------------------------------------------------------------------------------------------------------------------------------------------------------------------------------------------------------|-----------------------------------------------------------------------------------------------------------------------------------------------------------------------------------------------------|
| 1.Partnership               | The people whom the intervention aims to help are involved in decision-making about the intervention throughout the development process, having at least equal decision-making powers with members of the research team | Co-production, co-creation, co-design; user-driven; Experience-based co-design (EBCD); Community Based Participatory Research                                                                       |
| 2.Target population-centred | Interventions are based on the views and actions of the people who will use the intervention                                                                                                                            | Person-based; User-centred; Human-centred design                                                                                                                                                    |
| 3.Theory and evidence-based | Interventions are based on combining published research evidence and existing theories e.g. psychological or organisational theories                                                                                    | MRC Framework for developing and evaluating complex interventions; Behaviour Change Wheel (BCW); Intervention mapping (IM); Normalisation Process Theory (NPT); Theoretical Domains Framework (TDF) |
| 4. Implementation-based     | Interventions are developed with attention to ensuring the intervention will be used in the real world if found to be effective at the evaluation phase                                                                 | Reach, Effectiveness, Adoption, Implementation, Maintenance (RE-AIM)                                                                                                                                |
| 5. Efficiency based         | Components of an intervention are tested using experimental designs to determine active components and make interventions more efficient                                                                                | Multiphase Optimization Strategy (MOST)                                                                                                                                                             |
| 6. Stepped or phased        | Interventions are developed through emphasis on a systematic and sequential set of processes involved in intervention development                                                                                       | Six essential Steps for Quality Intervention Development (6SQUID); Five actions model; Obesity Related Behavioral Intervention Trials (ORBIT)                                                       |
| 7.Intervention-specific     | An intervention development approach is constructed for a specific type of intervention                                                                                                                                 | Digital (e.g. Integrate, Design, Assess and Share (IDEAS)); Patient decision support aids                                                                                                           |
| 8. Combination              | Published approaches to intervention development are combined                                                                                                                                                           | Participatory Action Research based on theories of Behaviour Change and Persuasive Technology (PAR –BCP)                                                                                            |
| 9. Pragmatic                | Developers use a self-selected set of actions                                                                                                                                                                           | Sometimes framed as mixed methods or formative evaluation                                                                                                                                           |

\*see reference [6] for references and examples

### Involve stakeholders throughout the development process

Many groups of people are likely to have a stake in the proposed intervention: the intervention may be aimed at patients or the public, or they may be expected to use the intervention; practitioners may deliver the intervention in a range of settings, e.g. hospitals, primary care, community care, social care, schools, communities, voluntary/third sector organisations; and users, policy makers or

1  
2  
3 tax payers may pay for the intervention. The rationale for involving relevant stakeholders from the  
4 start, and indeed working closely with them throughout, is that they can help to identify priorities,  
5 understand the problem and help find solutions that may make a difference to future  
6 implementation in the real world.  
7

8  
9 There are many ways of working with stakeholders and different ways may be relevant for different  
10 stakeholders at different times during the development process. Consultation may sometimes be  
11 appropriate, where a one-off meeting with a set of stakeholders helps developers to understand the  
12 context of the problem or the context in which the intervention would operate. Alternatively, the  
13 intervention may be designed closely with stakeholders using a co-production process, where  
14 stakeholders and developers generate ideas about potential interventions and make decisions  
15 together throughout the development process about its content, format, style and delivery.[12] This  
16 could involve a series of workshops and meetings to build relationships over time to facilitate  
17 understanding of the problem and generation of ideas for the new intervention. Co-production  
18 rather than consultation is likely to be important when buy-in is needed from a set of stakeholders  
19 to facilitate the feasibility, acceptability and engagement with the intervention, or the health  
20 problem or context is particularly complex. *Co-production involves stakeholders in this decision*  
21 *making whereas with consultation, decisions are made by the research team.* Stakeholders' views  
22 may also be obtained through qualitative interviews, surveys and stakeholder workshops, with  
23 methods tailored to the needs of each stakeholder. Innovative activities can be used to help engage  
24 stakeholders, for example: creative sessions facilitated by a design specialist might involve imagining  
25 what versions of the new intervention might look like if designed by various well known global  
26 manufacturers. Or creating a patient persona to help people think through the experiences of  
27 receiving an intervention. As well as participating in developing the intervention, stakeholders can  
28 help to shape the intervention development process itself. Members of the public, patients and  
29 service users are key stakeholders and experts recommend planning to integrate their involvement  
30 into the intervention development process from the start.  
31  
32  
33  
34  
35  
36  
37

### 38 **Bring together a team and establish decision making processes**

39  
40 Developers may choose to work within any size of team. Small teams can reach out to stakeholders  
41 at different points in the development process. Alternatively, large teams may include all the  
42 necessary expertise. Experts recommend including: experts in the problem to be addressed by the  
43 intervention; individuals with a strong track record in developing complex interventions; a behaviour  
44 change scientist when the intervention aims to change behaviour; and people who are skilled at  
45 maximising engagement of stakeholders. Other possible team members include experts in  
46 evaluation methods and economics. Within a co-production approach to development, key  
47 stakeholders participate as equal partners with researchers. Large teams can generate ideas and  
48 ensure all the relevant skills are available but may also increase the risk of conflicting views and  
49 difficulties when making decisions about the final intervention. There is no consensus on the size of  
50 team to have, but experts think it is important to agree a process for making decisions. In particular,  
51 experts recommend that team members understand their roles, rights and responsibilities;  
52 document the reasons for decisions made; and are prepared to test different options where there  
53 are team disagreements.  
54  
55  
56

### 57 **Review published research evidence**

1  
2  
3 Reviewing published research evidence before starting to develop an intervention can help to define  
4 the health problem and its determinants, understand the context in which the problem exists, clarify  
5 who the intervention should be aimed at, identify whether effective or cost-effective interventions  
6 already exist for the target population/ setting/problem, identify facilitators and barriers to  
7 delivering interventions in this context, and identify key uncertainties that need to be addressed  
8 using primary data collection. Continuing to review evidence throughout the process can help to  
9 address uncertainties that arise, for example if a new substantive intervention component is  
10 proposed then the research evidence about it can be explored. Evidence can change quickly, and  
11 keeping up with it by reviewing literature can alert developers to new relevant interventions that  
12 have been found to be effective or cost effective. Developers may be tempted to look for evidence  
13 that supports existing ideas and plans, but should also look for, and take into account, evidence that  
14 the proposed intervention may not work in the way intended. Undertaking systematic reviews is not  
15 always necessary because there may be recent relevant reviews available. Nor is it always possible in  
16 the context of tight resources available to the development team. However undertaking some  
17 review is important for ensuring that there are no existing interventions that would make the one  
18 under development redundant.  
19  
20  
21  
22

### 23 **Draw on existing theories**

24  
25 Some developers call their approaches to intervention development 'theory based' when they draw  
26 on psychological, sociological, organisational or implementation theories, or frameworks of theories,  
27 to inform their intervention.[6] The rationale for drawing on existing theories is that they can help to  
28 identify what is important, relevant and feasible to inform the intended goals of the  
29 intervention,[13] and inform the content and delivery of any intervention. It may be relevant to  
30 draw on more than one existing theory. Experts recommend considering which theories are relevant  
31 at the start of the development process. However, the utility of theories may need to be kept under  
32 scrutiny since in practice some developers have found that their selected theory proved difficult to  
33 apply during the development process.  
34  
35

### 36 **Articulate programme theory**

37  
38 A programme theory describes how a specific intervention is expected to lead to its effects and  
39 under what conditions.[14] It shows the causal pathways between the content of the intervention,  
40 intermediate outcomes and long term goals, and how these interact with contextual factors.  
41 Articulating programme theory at the start of the development process can help to communicate to  
42 funding agencies and stakeholders how the intervention will work. Existing theories may inform this  
43 programme theory. Logic models can be drawn to communicate different parts of the programme  
44 theory such as the causes of a problem, or the mechanisms by which an intervention will achieve  
45 outcomes, to both team members and external stakeholders. Figure 1 is an example of a logic  
46 model. The programme theory and logic models are not static. They should be tested and refined  
47 throughout the development process using primary and secondary data collection and stakeholder  
48 input. Indeed they are advocated for use in process evaluations alongside outcome evaluations in  
49 the recent MRC Guidance on process evaluation.[15]  
50  
51  
52  
53

### 54 **Undertake primary data collection**

55  
56 Primary data collection, usually involving mixed methods, can be used for a range of purposes  
57 throughout the intervention development process. Reviewing the evidence base may identify key  
58 uncertainties that primary data collection can then address. Non-participant observation can be  
59 used to understand the setting in which the intervention will be used. Qualitative interviews with  
60

1  
2  
3 the target population or patient group can identify what matters most to people, their lived  
4 experience, or why people behave as they do. 'Verbal protocol', which involves users of an  
5 intervention talking aloud about it as they use it,[16] can be undertaken to understand the usability  
6 of early versions of the intervention. Pre-test post-test measures may be taken of intermediate  
7 outcomes to begin early testing of some aspects of the programme theory, an activity that will  
8 continue into the feasibility and evaluation phases of the MRC framework and may lead to changes  
9 to the programme theory. Surveys, discrete choice experiments, or qualitative interviews can be  
10 used to assess the acceptability, values and priorities of those delivering and receiving the  
11 intervention.  
12  
13

### 14 **Understand the context**

15  
16 Recent guidance on context in population health intervention research identifies a breadth of  
17 features including those relating to population and individuals; physical location or geographical  
18 setting; social, economic, cultural and political influences; and factors affecting implementation, e.g.  
19 organisation, funding, policy.[17] An important context is the specific setting in which the  
20 intervention will be used, for example within a busy emergency department or within people's homes.  
21 The rationale for understanding this context, and developing interventions which can operate within  
22 it, is to avoid developing interventions that fail during later evaluation because too few people  
23 deliver or use them. Context also includes the wider complex health and social care, societal or  
24 political systems within which any intervention will operate.[18] Different approaches can be taken  
25 to understand context, including reviews of evidence, stakeholder engagement and primary data  
26 collection. A challenge of understanding context is that it may change rapidly over the course of the  
27 development process.  
28  
29  
30  
31

### 32 **Pay attention to future implementation of the intervention in the real world**

33  
34 The end goal of developers or those who fund development is real-world implementation rather  
35 than simply the development of an intervention that is shown to be effective or cost-effective in a  
36 future evaluation.[7] Many interventions do not lead to change in policy or practice, and it is  
37 important that effective interventions inform policy and are eventually used in the real world to  
38 improve health and care. To achieve this goal, developers may pay attention early on in the  
39 development process to factors that might affect use of the intervention, 'scale up' of the  
40 intervention for use nationally or internationally, and sustainability. For example, consideration of  
41 the cost of the intervention at an early stage, or including as stakeholders official bodies or policy  
42 makers that would endorse or accredit the intervention, may help its future implementation.  
43 Implementation-based approaches to intervention development are listed in Table 2. Some other  
44 approaches listed in this table, such as the Normalisation Process Theory, also emphasise  
45 implementation in the real world.  
46  
47  
48

### 49 **Design and refine the intervention**

50  
51 The term 'design' is sometimes used interchangeably with the term 'development'. However, it is  
52 useful to see design as a specific creative part of the development process where ideas are  
53 generated, and decisions are made about the intervention components and how it will be delivered,  
54 by whom, and where. Design starts with generation of ideas about the content, format, style and  
55 delivery of the proposed intervention. The process of design may use creative ways of generating  
56 ideas, for example using games or physically making rough prototypes. Some teams include experts  
57 in design or use designers external to the team when undertaking this action. The rationale for a  
58  
59  
60

1  
2  
3 wide-ranging and creative design process is to identify innovative and workable ideas that may not  
4 otherwise have been considered.  
5

6 After generating ideas, a mock up or prototype of the intervention or a key component may be  
7 created to allow stakeholders to offer views on it. Once an early version or prototype of the  
8 intervention is available, it can be refined (sometimes called optimised) using a series of rapid  
9 iterations where each iteration includes an assessment of how acceptable, feasible and engaging the  
10 intervention is, leading to cycles of refinements. The programme theory and logic models are  
11 important at this point and developers may test whether some of their proposed mechanisms of  
12 action are impacting on intermediate outcomes if statistical power allows. The rationale for  
13 spending time on multiple iterations is that problems can be identified and solutions found prior to  
14 any expensive future feasibility or evaluation phase. Some experts take a quantitative approach to  
15 optimisation of an intervention, specifically the Multiphase Optimization Strategy (MOST) in Table 2,  
16 but not all experts agree that this is necessary.  
17  
18  
19

### 20 **End the development phase**

21  
22 Seeing this endeavour as a discrete 'intervention development phase' that comes to an end may feel  
23 artificial. In practice there is overlap between some actions taken in the development phase and the  
24 feasibility phase of the MRC framework,[1] such as consideration of acceptability and some  
25 measurement of change in intermediate outcomes. Developers may return to the intervention  
26 development phase if findings from the feasibility phase identify significant problems with the  
27 intervention. In many ways, development never stops because developers will continue to learn  
28 about the intervention, and refine it, during the later pilot/feasibility, evaluation and  
29 implementation phases. The intention may be that some types of intervention continuously evolve  
30 during evaluation and implementation, which may reduce the amount of time spent on the  
31 development phase. However, developers need to decide when to stop that first intensive  
32 development phase, either in terms of abandoning the intervention because pursuing it is likely to  
33 be futile, or moving on to the next phase of feasibility/piloting testing or full evaluation. They also  
34 face the challenge of convincing potential funders of an evaluation that enough development has  
35 occurred to risk spending resources on its pilot or evaluation. The decision to end the development  
36 phase may be partly informed by practicalities, such as the amount of time and money available, and  
37 partly by the concepts of data saturation and information power (used in qualitative research) in  
38 that the intensive process stops when few refinements are suggested by those delivering or using  
39 the intervention during its period of refinement, or these and other stakeholders indicate that the  
40 intervention feels appropriate to them.  
41  
42  
43  
44

45 At the end of the development process, policy makers, developers or service providers external to  
46 the original team may want to implement or evaluate the intervention. Describing the intervention,  
47 using one of the relevant reporting guidelines such as TIDieR (Template for Intervention Description  
48 and Replication) Checklist, [19] and producing a manual or document that describes the training as  
49 well as content of the intervention, can facilitate this. This information can be made available on a  
50 website, and, for some digital interventions, the intervention itself can be made available. It is  
51 helpful to publish the intervention development process because it allows others to make links in  
52 the future between intervention development processes and the subsequent success of  
53 interventions, and learn about intervention development endeavours. Publishing failed attempts to  
54 develop an intervention, as well as those that produce an intervention, may help to reduce research  
55 waste. Reporting multiple, iterative and interacting processes in these articles is challenging,  
56 particularly in the context of limited word count for some journals. It may be necessary to publish  
57  
58  
59  
60

1  
2  
3 more than one paper to describe the development if multiple lessons have been learnt for future  
4 development studies.  
5  
6  
7

## 8 **Conclusions**

9  
10 This guidance on intervention development presents a set of principles and actions for future  
11 developers to consider throughout the development process. There is insufficient research evidence  
12 to recommend that a particular published approach or set of actions is essential to produce a  
13 successful intervention. Some aspects of the guidance may not be relevant to some interventions or  
14 contexts, and not all developers are fortunate enough to have a large amount of resource available  
15 to them, so a flexible approach to using the guidance is required. The best way to use the guidance is  
16 to consider each action by addressing its relevance to a specific intervention in a specific context,  
17 both at the start and throughout the development process.  
18  
19  
20  
21  
22  
23

24 **Contributors:** AOC and PH led the development of the guidance, wrote the first draft of the article,  
25 and the full guidance document which it describes, and integrated contributions from the author  
26 group into subsequent drafts. All authors contributed to the design and content of the guidance and  
27 subsequent drafts of the paper. The guidance is based on reviews and primary research. AOC led the  
28 review of different approaches to intervention development working with KS. LC led the review of  
29 primary research working with KS. PH led the qualitative interview study working with NR, KT and  
30 ED. ED led the consensus exercise working with NR. AOC acts as guarantor.  
31  
32  
33  
34

35 **Funding:** MRC-NIHR Methodology Research Panel (MR/N015339/1). Funders had no influence on  
36 the guidance presented here. The authors were fully independent of the funders.  
37

38 **Competing interests:** All authors have read and understood BMJ Group policy on declaration of  
39 interests and have no relevant interests to declare.  
40

41 **Acknowledgements:** This guidance is based on secondary and primary research. Many thanks to  
42 participants in the e-Delphis, consensus conference and qualitative interviews; to members of our  
43 Expert Panel; and to people who attended workshops discussing this guidance. The researchers  
44 leading the update of the MRC guidance on developing and evaluating interventions, due to be  
45 published later this year, also offered insightful comments on our guidance to facilitate fit between  
46 the two sets of guidance.  
47  
48  
49  
50

## 51 **References**

- 52  
53 1. Craig P, Dieppe P, Macintyre S, et al. Developing and evaluating complex interventions: the new  
54 Medical Research Council guidance. *BMJ* 2008;337:a1655. doi: 10.1136/bmj.a1655  
55 2. Edwardson C, Yates T, Biddle S, et al. Effectiveness of the Stand More AT (SMaRT) Work  
56 intervention: cluster randomised controlled trial. *BMJ* 2018;363:k3870. doi:  
57 10.1136/bmj.k3870  
58 3. Hoddinott P. A new era for intervention development studies. *Pilot Feasibility Stud* 2015;1(36):1-4.  
59 doi: 10.1186/s40814-015-0032-0  
60

- 1
- 2
- 3
4. Bleijenberg, de Man-van Ginkel JM, Trappenburg JCA, et al. Increasing value and reducing waste by optimizing the development of complex interventions: Enriching the development phase of the Medical Research Council (MRC) Framework. *International Journal of Nursing Studies* 2018;79: 86-93.
5. Bartholomew Eldredge LK, Parcel GS, Kok G, et al. Planning Health Promotion Programmes: An Intervention Mapping Approach. 3rd ed. San Francisco, CA, USA: John Wiley & Sons 2011.
6. O’Cathain A, Croot L, Sworn K, et al. Taxonomy of approaches to developing interventions to improve health: a systematic methods overview. *Pilot Feasibility Stud* 2019; 5:41
7. Turner K, Rousseau N, O’Cathain A, et al. Successful intervention development and its drivers: a qualitative interview study. *BMJ Open* in press
8. Garba R, Gadanya M. The role of intervention mapping in designing disease prevention interventions: A systematic review of the literature. *PLoS One* 2017;12(3):e0174438. doi: 10.1371/journal.pone.0174438
9. Clarke D, Jones F, Harris R, et al. What outcomes are associated with developing and implementing co-produced interventions in acute healthcare settings? A rapid evidence synthesis. *BMJ Open* 2017;7(7):e014650. doi: 10.1136/bmjopen-2016-014650
10. Dalgetty R, Miller CB, Dombrowski SU. Examining the theory-effectiveness hypothesis: A systematic review of systematic reviews. *British Journal of Health Psychology* 2019;24: 334–356
11. W K Kellogg Foundation. *Logic Model Development Guide*, 2004 Available from: <https://www.bttop.org/sites/default/files/public/W.K.%20Kellogg%20LogicModel.pdf> [Access Date 30.11.2018].
12. INVOLVE. *Guidance on co-producing a research project*, 2018 Available from: [http://www.invo.org.uk/wp-content/uploads/2018/03/Copro\\_Guidance\\_Mar18.pdf](http://www.invo.org.uk/wp-content/uploads/2018/03/Copro_Guidance_Mar18.pdf) [Access Date 30.11.2018].
13. Davidoff F, Dixon-Woods M, Leviton L, et al. Demystifying theory and its use in improvement. *BMJ Qual Saf* 2015;24(3):228-38. doi: 1136/bmjqs-2014-003627
14. Rogers PJ. Using programme theory to evaluate complicated and complex aspects of interventions. *Evaluation* 2008;14: 29-48.
15. Moore G, Audrey S, Barker M, et al. Process evaluation of complex interventions. Medical Research Council guidance. *BMJ* 2015 350:h1258.
16. Fonteyn M, Kuipers B, Grobe S. A Description of Think Aloud Method and Protocol Analysis. *Qual Health Res* 1993;3(4):430-41. doi: 10.1177/10497323930030
17. Craig P, Di Ruggiero E, Frohlich K, et al. Taking account of context in population health intervention research: guidance for producers, users and funders of research. Southampton: NIHR Evaluation, Trials and Studies Coordinating Centre 2018.
18. Moore G, Evans R, Hawkins J, et al. From complex social interventions to interventions in complex social systems: Future directions and unresolved questions for intervention development and evaluation. *Evaluation* 2019;25(1):23-45. doi: 10.1177/1356389018803219
19. Hoffmann T, Glasziou P, Boutron I, et al. Better reporting of interventions: template for intervention description and replication (TIDieR) checklist and guide. *BMJ* 2014;348:g1687. doi: 10.1136/bmj.g1687



1  
2  
3  
4  
5  
6  
7  
8  
9  
10  
11  
12  
13  
14  
15  
16  
17  
18  
19  
20  
21  
22  
23  
24  
25  
26  
27  
28  
29  
30  
31  
32  
33  
34  
35  
36  
37  
38  
39  
40  
41  
42  
43  
44  
45  
46  
47  
48  
49  
50  
51  
52  
53  
54  
55  
56  
57  
58  
59  
60

For peer review only

1  
2  
3  
4  
5  
6  
7  
8  
9  
10  
11  
12  
13  
14  
15  
16  
17  
18  
19  
20  
21  
22  
23  
24  
25  
26  
27  
28  
29  
30  
31  
32  
33  
34  
35  
36  
37  
38  
39  
40  
41  
42  
43  
44  
45  
46  
47  
48  
49  
50  
51  
52  
53  
54  
55  
56  
57  
58  
59  
60

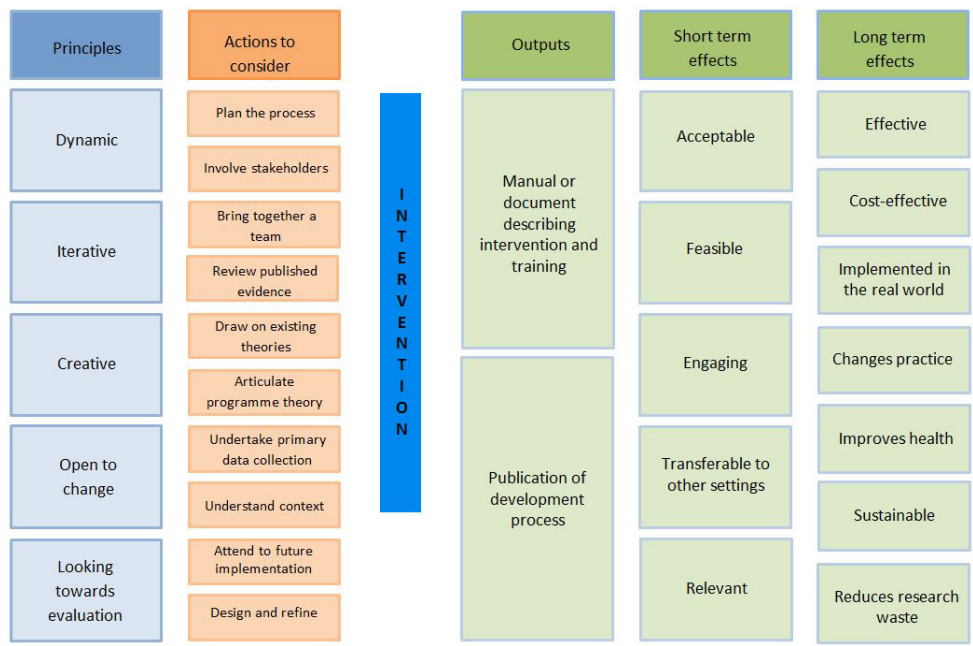

Figure 1 Logic model for intervention development – insert here

1  
2  
3  
4  
5  
6  
7  
8  
9  
10  
11  
12  
13  
14  
15  
16  
17  
18  
19  
20  
21  
22  
23  
24  
25  
26  
27  
28  
29  
30  
31  
32  
33  
34  
35  
36  
37  
38  
39  
40  
41  
42  
43  
44  
45  
46

**Appendix 1 Results of the e-Delphis**

The question asked was ‘When developing complex interventions to improve health, how important is it to...’ with options of very important=5, fairly important=4, somewhat important=3, slightly important=2, not at all important =1. Numbers stating ‘Do Not Know’ are not reported here.

The column ‘% agree’ presents the percentage ticking very important=5 or fairly important=4.

Consensus was set at 70% agreement for ‘very or fairly important’ or ‘slightly or not important at all’.

The items are presented in order of consensus for developers.

The dark shaded cells are the most frequently ticked options.

| No. | Item                                                                                          | Mode score | % Agree | Developers           |                    |                    |                  |                | Mode score | % Agree | Wider                |                    |                    |                  |                |
|-----|-----------------------------------------------------------------------------------------------|------------|---------|----------------------|--------------------|--------------------|------------------|----------------|------------|---------|----------------------|--------------------|--------------------|------------------|----------------|
|     |                                                                                               |            |         | Not at all important | Slightly important | Somewhat important | Fairly important | Very important |            |         | Not at all important | Slightly important | Somewhat important | Fairly important | Very important |
| 1   | Be open to the potential that the final intervention may be different from the initial vision | 5          | 100     | 0                    | 0                  | 0                  | 0                | 26             | 5          | 100     | 0                    | 0                  | 0                  | 2                | 16             |
| 2   | Report the purpose of the intervention                                                        | 5          | 100     | 0                    | 0                  | 0                  | 0                | 26             | 5          | 100     | 0                    | 0                  | 0                  | 1                | 16             |
| 3   | Report the target population                                                                  | 5          | 100     | 0                    | 0                  | 0                  | 1                | 25             | 5          | 100     | 0                    | 0                  | 0                  | 1                | 17             |
| 4   | Clearly define the health problem to be addressed                                             | 5          | 100     | 0                    | 0                  | 0                  | 1                | 24             | 5          | 100     | 0                    | 0                  | 0                  | 1                | 17             |
| 5   | Review the published evidence before starting to develop an intervention                      | 5          | 100     | 0                    | 0                  | 0                  | 1                | 24             | 5          | 100     | 0                    | 0                  | 0                  | 1                | 17             |
| 6   | Be open to failure and going back a step                                                      | 5          | 100     | 0                    | 0                  | 0                  | 2                | 24             | 5          | 100     | 0                    | 0                  | 0                  | 4                | 13             |
| 7   | Ensure team members understand the context in which the intervention will be implemented      | 5          | 100     | 0                    | 0                  | 0                  | 3                | 23             | 5          | 100     | 0                    | 0                  | 0                  | 3                | 15             |
| 8   | Report any use of components from an existing intervention                                    | 5          | 100     | 0                    | 0                  | 0                  | 4                | 22             | 4          | 100     | 0                    | 0                  | 0                  | 14               | 4              |

|    |                                                                                                                    |   |     |   |   |   |    |    |   |     |   |   |   |    |    |
|----|--------------------------------------------------------------------------------------------------------------------|---|-----|---|---|---|----|----|---|-----|---|---|---|----|----|
| 9  | Report how evidence from different sources informed the intervention development                                   | 5 | 100 | 0 | 0 | 0 | 5  | 21 | 5 | 100 | 0 | 0 | 0 | 5  | 13 |
| 10 | Report how stakeholders contributed to the intervention development process                                        | 5 | 100 | 0 | 0 | 0 | 6  | 20 | 4 | 94  | 0 | 0 | 1 | 14 | 3  |
| 11 | Report important uncertainties at the end of the intervention development process.                                 | 5 | 100 | 0 | 0 | 0 | 7  | 19 | 5 | 78  | 0 | 1 | 3 | 0  | 14 |
| 12 | Look for and take into account evidence that your proposed intervention may not work in the way you intend         | 4 | 100 | 0 | 0 | 0 | 17 | 9  | 5 | 89  | 0 | 0 | 2 | 2  | 14 |
| 13 | Consider the evidence for each substantive intervention component                                                  | 5 | 100 | 0 | 0 | 0 | 11 | 15 | 4 | 94  | 0 | 0 | 1 | 17 | 0  |
| 14 | Have a plan to guide how you will use evidence during the design process                                           | 4 | 100 | 0 | 0 | 0 | 13 | 13 | 4 | 89  | 0 | 0 | 2 | 16 | 0  |
| 15 | Develop the intervention in an iterative way with regular stakeholder input throughout                             | 5 | 96  | 0 | 1 | 0 | 0  | 25 | 5 | 82  | 0 | 1 | 2 | 3  | 11 |
| 16 | Report the context for which the intervention was developed                                                        | 5 | 96  | 0 | 0 | 1 | 0  | 25 | 5 | 100 | 0 | 0 | 0 | 2  | 16 |
| 17 | Ensure the team includes experts in the problem to be addressed by the intervention                                | 5 | 96  | 0 | 1 | 0 | 1  | 24 | 5 | 94  | 0 | 0 | 1 | 1  | 16 |
| 18 | Consider facilitators and barriers to future use of the intervention in the real world                             | 5 | 96  | 0 | 1 | 0 | 1  | 24 | 5 | 94  | 0 | 0 | 1 | 1  | 16 |
| 19 | Ensure the team specifically includes a behaviour change scientist when the intervention aims to change behaviour. | 5 | 96  | 0 | 0 | 1 | 2  | 23 | 5 | 83  | 0 | 0 | 3 | 3  | 12 |
| 20 | Document key reasons for decisions made throughout the process                                                     | 5 | 96  | 0 | 0 | 1 | 3  | 22 | 5 | 82  | 0 | 0 | 3 | 2  | 12 |
| 21 | Clearly define the target population: the group of people that will receive the intervention                       | 5 | 96  | 0 | 0 | 1 | 3  | 22 | 5 | 100 | 0 | 0 | 0 | 1  | 17 |
| 22 | Ensure high levels of collaboration with stakeholders throughout the development process                           | 5 | 96  | 0 | 1 | 0 | 3  | 22 | 5 | 94  | 0 | 0 | 1 | 2  | 15 |

|    |                                                                                                                                           |   |    |    |    |   |    |    |   |     |   |    |   |    |    |
|----|-------------------------------------------------------------------------------------------------------------------------------------------|---|----|----|----|---|----|----|---|-----|---|----|---|----|----|
| 23 | Engage all relevant stakeholders                                                                                                          | 5 | 96 | 0  | 0  | 1 | 4  | 21 | 5 | 100 | 0 | 0  | 0 | 4  | 13 |
| 24 | Generate a programme theory/ logic model for how the intervention will have an effect                                                     | 5 | 96 | 0  | 0  | 1 | 4  | 21 | 4 | 94  | 0 | 0  | 1 | 13 | 3  |
| 25 | Identify existing interventions and consider whether they could be adapted                                                                | 5 | 96 | 0  | 0  | 1 | 4  | 21 | 5 | 100 | 0 | 0  | 0 | 2  | 15 |
| 26 | Seek stakeholders' perspectives on several possible versions of the intervention at a very early stage                                    | 5 | 96 | 0  | 0  | 1 | 4  | 21 | 5 | 89  | 0 | 1  | 1 | 5  | 11 |
| 27 | Carry out feasibility research throughout the intervention development                                                                    | 5 | 96 | 0  | 0  | 1 | 5  | 20 | 4 | 89  | 0 | 1  | 1 | 15 | 1  |
| 28 | Consider interactions between parts of the intervention                                                                                   | 4 | 96 | 0  | 0  | 1 | 20 | 5  | 5 | 94  | 0 | 0  | 1 | 7  | 9  |
| 29 | Develop a plan to integrate patient and public involvement (PPI) into the intervention development process                                | 5 | 96 | 1  | 0  | 0 | 5  | 20 | 5 | 83  | 0 | 0  | 3 | 2  | 13 |
| 30 | Stay open minded about the structure, content and delivery of the intervention                                                            | 5 | 96 | 0  | 0  | 1 | 5  | 20 | 5 | 94  | 0 | 0  | 1 | 6  | 11 |
| 31 | Report any changes to interventions required or likely to be required for subgroups                                                       | 5 | 96 | 0  | 0  | 1 | 6  | 19 | 4 | 83  | 0 | 1  | 2 | 9  | 6  |
| 32 | Focus on designing the content, format and delivery of the intervention as much as on gathering or synthesising the evidence to inform it | 4 | 96 | 0  | 0  | 1 | 17 | 8  | 4 | 78  | 0 | 0  | 4 | 13 | 1  |
| 33 | Have a team large enough to include individuals with all the necessary expertise.                                                         | 4 | 96 | 0  | 1  | 0 | 17 | 8  | 4 | 100 | 0 | 0  | 0 | 9  | 9  |
| 34 | Evaluate important components where there has been team disagreement about aspects of content, format or delivery                         | 4 | 96 | 0  | 0  | 1 | 15 | 10 | 4 | 72  | 0 | 0  | 5 | 13 | 0  |
| 35 | Do intervention development quickly                                                                                                       | 1 | 96 | 13 | 12 | 0 | 1  | 0  | 2 | 94  | 2 | 15 | 1 | 0  | 0  |
| 36 | Ensure the team includes members who are skilled at maximising engagement of                                                              | 5 | 96 | 0  | 0  | 1 | 12 | 13 | 4 | 83  | 0 | 0  | 3 | 11 | 4  |

|    | stakeholders                                                                                                                           |   |    |   |   |   |    |    |   |     |   |   |   |    |    |
|----|----------------------------------------------------------------------------------------------------------------------------------------|---|----|---|---|---|----|----|---|-----|---|---|---|----|----|
| 37 | Involve stakeholders who are members of the target population.                                                                         | 5 | 92 | 0 | 0 | 2 | 0  | 24 | 5 | 100 | 0 | 0 | 0 | 4  | 14 |
| 38 | Identify an existing published theory or theories to inform the intervention at the start                                              | 4 | 92 | 0 | 1 | 0 | 21 | 3  | 4 | 100 | 0 | 0 | 0 | 17 | 1  |
| 39 | Report how any published intervention development approach contributed to the development process                                      | 5 | 92 | 0 | 0 | 2 | 3  | 21 | 4 | 71  | 0 | 0 | 5 | 11 | 1  |
| 40 | Report how existing published theory informed the intervention development process                                                     | 5 | 92 | 0 | 0 | 2 | 3  | 21 | 5 | 94  | 0 | 0 | 1 | 5  | 12 |
| 41 | Check that the proposed mechanisms of action are supported by early testing                                                            | 4 | 92 | 0 | 1 | 1 | 18 | 6  | 5 | 94  | 0 | 0 | 1 | 3  | 14 |
| 42 | Undertake qualitative data collection to understand the context in which the intervention will be delivered                            | 5 | 92 | 0 | 1 | 1 | 8  | 16 | 4 | 83  | 0 | 0 | 3 | 12 | 3  |
| 43 | Consider unintended consequences of the intervention                                                                                   | 5 | 92 | 0 | 0 | 2 | 9  | 15 | 5 | 94  | 0 | 0 | 1 | 8  | 9  |
| 44 | Ensure all members of the team have the skills and personal qualities to contribute constructively in an interdisciplinary environment | 5 | 92 | 0 | 1 | 1 | 9  | 15 | 4 | 78  | 0 | 1 | 3 | 14 | 0  |
| 45 | Report any guiding principles, people or factors which were prioritised when making decisions                                          | 5 | 92 | 0 | 0 | 2 | 11 | 13 | 4 | 83  | 0 | 1 | 2 | 13 | 2  |
| 46 | Collect data from a diverse sample of those who will deliver and receive the intervention                                              | 5 | 92 | 0 | 1 | 1 | 10 | 13 | 4 | 94  | 0 | 0 | 1 | 15 | 2  |
| 47 | Consider the different levels that the intervention may target and impact (patients, professionals, communities, services)             | 5 | 88 | 0 | 0 | 3 | 2  | 21 | 4 | 94  | 0 | 1 | 0 | 11 | 6  |

1  
2  
3  
4  
5  
6  
7  
8  
9  
10  
11  
12  
13  
14  
15  
16  
17  
18  
19  
20  
21  
22  
23  
24  
25  
26  
27  
28  
29  
30  
31  
32  
33  
34  
35  
36  
37  
38  
39  
40  
41  
42  
43  
44  
45  
46

|    |                                                                                                                   |   |    |   |   |   |    |    |   |     |   |   |    |    |    |
|----|-------------------------------------------------------------------------------------------------------------------|---|----|---|---|---|----|----|---|-----|---|---|----|----|----|
| 48 | Draw on a published intervention development approach                                                             | 4 | 88 | 0 | 2 | 1 | 20 | 3  | 3 | 6   | 0 | 1 | 16 | 1  | 0  |
| 49 | Test and refine the programme theory, or logic model, within the development process                              | 5 | 88 | 0 | 0 | 3 | 5  | 18 | 4 | 94  | 0 | 1 | 0  | 14 | 2  |
| 50 | Specify gaps and uncertainties in the existing evidence                                                           | 4 | 88 | 0 | 0 | 3 | 16 | 7  | 5 | 94  | 0 | 0 | 1  | 6  | 11 |
| 51 | Ensure the team includes individuals with a strong track record in designing complex interventions                | 5 | 88 | 1 | 0 | 2 | 8  | 15 | 4 | 88  | 0 | 0 | 2  | 14 | 2  |
| 52 | Report how the intervention changed in content and format from the start of the intervention development process  | 4 | 88 | 0 | 3 | 0 | 15 | 8  | 4 | 94  | 0 | 1 | 0  | 13 | 4  |
| 53 | Report the reasons for discarding intervention components that were considered                                    | 5 | 88 | 0 | 0 | 3 | 9  | 14 | 4 | 88  | 0 | 0 | 2  | 15 | 0  |
| 54 | Use the term 'intervention development' in the title and abstract of any report or publication.                   | 4 | 85 | 1 | 2 | 1 | 18 | 4  | 3 | 24  | 1 | 2 | 10 | 2  | 2  |
| 55 | Identify sub-populations that the intervention may need to be adapted for or tailored to                          | 4 | 85 | 0 | 0 | 4 | 14 | 8  | 4 | 83  | 0 | 1 | 2  | 14 | 1  |
| 56 | Produce an intervention development protocol detailing the processes to be undertaken to develop the intervention | 5 | 85 | 0 | 2 | 2 | 10 | 12 | 4 | 88  | 0 | 0 | 2  | 15 | 0  |
| 57 | Apply a published intervention development approach flexibly depending on context                                 | 5 | 84 | 0 | 1 | 3 | 7  | 14 | 4 | 83  | 0 | 0 | 3  | 14 | 1  |
| 58 | Follow TIDieR guidance when describing the developed intervention                                                 | 5 | 80 | 3 | 0 | 2 | 7  | 13 | 5 | 88  | 0 | 0 | 2  | 6  | 9  |
| 59 | Collect evidence using a diverse range of methods                                                                 | 5 | 80 | 0 | 0 | 5 | 9  | 11 | 4 | 100 | 0 | 0 | 0  | 17 | 1  |
| 60 | Draw on more than one existing published theory e.g. both psychological and                                       | 4 | 77 | 0 | 2 | 4 | 19 | 1  | 4 | 50  | 1 | 0 | 8  | 9  | 0  |

|    | organisational theories                                                                                                                    |   |    |   |    |    |    |    |   |    |   |   |    |    |    |
|----|--------------------------------------------------------------------------------------------------------------------------------------------|---|----|---|----|----|----|----|---|----|---|---|----|----|----|
| 61 | Have a small sub-team that makes final decisions about the intervention                                                                    | 4 | 77 | 1 | 1  | 4  | 19 | 1  | 4 | 61 | 1 | 0 | 6  | 10 | 1  |
| 62 | Use the existing published theories that you have identified to inform the collection of evidence                                          | 4 | 77 | 1 | 1  | 4  | 16 | 4  | 4 | 67 | 0 | 0 | 6  | 12 | 0  |
| 63 | Agree a process for making decisions within the team about intervention content, format and delivery                                       | 5 | 77 | 0 | 0  | 6  | 5  | 15 | 4 | 94 | 0 | 0 | 1  | 15 | 1  |
| 64 | Report the intervention development in an open access format (e.g. open access journal, report chapter, website)                           | 4 | 77 | 1 | 1  | 4  | 13 | 7  | 5 | 89 | 0 | 0 | 2  | 5  | 11 |
| 65 | Have a funded study with sufficient resources                                                                                              | 4 | 73 | 0 | 0  | 7  | 14 | 5  | 5 | 88 | 0 | 0 | 2  | 1  | 14 |
| 66 | Establish a set of guiding principles to facilitate decision making about intervention content, format and delivery                        | 4 | 73 | 0 | 1  | 6  | 12 | 7  | 4 | 76 | 0 | 0 | 4  | 11 | 2  |
| 67 | Ensure the intervention development team members know their specific roles, rights and responsibilities                                    | 5 | 73 | 0 | 0  | 7  | 8  | 11 | 5 | 83 | 1 | 1 | 1  | 2  | 13 |
| 68 | Follow every step in a published intervention development approach                                                                         | 2 | 69 | 3 | 15 | 6  | 1  | 1  | 3 | 59 | 5 | 5 | 7  | 0  | 0  |
| 69 | Include all stakeholders when making final decisions about the intervention                                                                | 4 | 58 | 0 | 2  | 9  | 12 | 3  | 4 | 83 | 0 | 1 | 2  | 13 | 2  |
| 70 | Ensure the team includes a commissioner or purchaser of health care                                                                        | 2 | 54 | 1 | 13 | 8  | 3  | 1  | 3 | 33 | 1 | 5 | 10 | 1  | 1  |
| 71 | Try to design the intervention for use in a wide range of settings                                                                         | 2 | 52 | 1 | 12 | 7  | 5  | 0  | 3 | 17 | 0 | 1 | 14 | 3  | 0  |
| 72 | Periodically consider whether additional or alternative existing published theories may be helpful to inform the intervention development. | 4 | 50 | 1 | 2  | 10 | 13 | 0  | 4 | 67 | 0 | 1 | 5  | 12 | 0  |



1  
2  
3  
4  
5  
6  
7  
8  
9  
10  
11  
12  
13  
14  
15  
16  
17  
18  
19  
20  
21  
22  
23  
24  
25  
26  
27  
28  
29  
30  
31  
32  
33  
34  
35  
36  
37  
38  
39  
40  
41  
42  
43  
44  
45  
46

|    |                                                                                                                                             |   |    |   |    |    |    |   |   |    |   |   |    |    |   |
|----|---------------------------------------------------------------------------------------------------------------------------------------------|---|----|---|----|----|----|---|---|----|---|---|----|----|---|
| 73 | Have a formal consensus exercise to finalise the content, format and delivery of the intervention                                           | 2 | 50 | 1 | 12 | 7  | 4  | 2 | 3 | 22 | 1 | 3 | 13 | 1  | 0 |
| 74 | Have equity of decision making amongst key stakeholders and researchers                                                                     | 2 | 50 | 2 | 11 | 9  | 2  | 2 | 3 | 22 | 3 | 1 | 10 | 2  | 2 |
| 75 | The team uses methods to enable stakeholders to be creative                                                                                 | 3 | 46 | 0 | 1  | 13 | 6  | 6 | 4 | 78 | 0 | 2 | 2  | 12 | 2 |
| 76 | Ensure the team includes someone with a background specifically in product or pathway design                                                | 4 | 46 | 0 | 3  | 11 | 12 | 0 | 4 | 65 | 0 | 3 | 3  | 11 | 0 |
| 77 | Undertake statistical and economic modelling to consider whether an intervention is likely to be worthwhile                                 | 2 | 46 | 3 | 9  | 3  | 8  | 3 | 4 | 56 | 0 | 3 | 5  | 9  | 1 |
| 78 | Report the background and contribution of those making decisions about the intervention content, format and delivery                        | 3 | 42 | 0 | 4  | 11 | 6  | 5 | 4 | 67 | 1 | 0 | 5  | 10 | 2 |
| 79 | Consider the potential cost of several possible versions of the intervention at a very early stage                                          | 3 | 35 | 0 | 2  | 15 | 8  | 1 | 3 | 0  | 0 | 0 | 18 | 0  | 0 |
| 80 | Have a clear plan of how evidence, data and opinions from different sources will be prioritised and inform the final intervention           | 3 | 35 | 0 | 2  | 15 | 7  | 2 | 4 | 94 | 0 | 0 | 1  | 16 | 0 |
| 81 | Report the time taken to develop the intervention                                                                                           | 3 | 27 | 1 | 1  | 17 | 4  | 3 | 3 | 17 | 0 | 3 | 14 | 1  | 0 |
| 82 | Consider intellectual property (IP) issues                                                                                                  | 3 | 27 | 3 | 1  | 15 | 4  | 3 | 3 | 39 | 0 | 5 | 6  | 6  | 1 |
| 83 | Report who, when, why and where the original idea for developing the intervention came from                                                 | 3 | 27 | 3 | 1  | 15 | 5  | 2 | 4 | 67 | 2 | 1 | 3  | 9  | 3 |
| 84 | Undertake a quantitative optimisation process to ensure only the strongest components of the intervention are included in the final version | 3 | 27 | 2 | 5  | 15 | 4  | 0 | 3 | 19 | 1 | 2 | 13 | 0  | 0 |

1  
2  
3  
4  
5  
6  
7  
8  
9  
10  
11  
12  
13  
14  
15  
16  
17  
18  
19  
20  
21  
22  
23  
24  
25  
26  
27  
28  
29  
30  
31  
32  
33  
34  
35  
36  
37  
38  
39  
40  
41  
42  
43  
44  
45  
46

|    |                                                                           |   |    |   |   |    |   |   |   |    |   |   |    |   |   |
|----|---------------------------------------------------------------------------|---|----|---|---|----|---|---|---|----|---|---|----|---|---|
| 85 | Ensure the team includes someone who has developed a similar intervention | 3 | 23 | 1 | 5 | 17 | 3 | 0 | 3 | 22 | 1 | 3 | 14 | 0 | 0 |
|----|---------------------------------------------------------------------------|---|----|---|---|----|---|---|---|----|---|---|----|---|---|

For peer review only

# BMJ Open

## Guidance on how to develop complex interventions to improve health and health care

|                                 |                                                                                                                                                                                                                                                                                                                                                                                                                                                                                                                                                                                                                                                          |
|---------------------------------|----------------------------------------------------------------------------------------------------------------------------------------------------------------------------------------------------------------------------------------------------------------------------------------------------------------------------------------------------------------------------------------------------------------------------------------------------------------------------------------------------------------------------------------------------------------------------------------------------------------------------------------------------------|
| Journal:                        | <i>BMJ Open</i>                                                                                                                                                                                                                                                                                                                                                                                                                                                                                                                                                                                                                                          |
| Manuscript ID                   | bmjopen-2019-029954.R3                                                                                                                                                                                                                                                                                                                                                                                                                                                                                                                                                                                                                                   |
| Article Type:                   | Communication                                                                                                                                                                                                                                                                                                                                                                                                                                                                                                                                                                                                                                            |
| Date Submitted by the Author:   | 27-Jun-2019                                                                                                                                                                                                                                                                                                                                                                                                                                                                                                                                                                                                                                              |
| Complete List of Authors:       | O'Cathain, Alicia; University of Sheffield School of Health and Related Research<br>Croot, Liz; University of Sheffield, MCRU,SCHARR<br>Duncan, Edward; University of Stirling<br>Rousseau, Nikki; University of Stirling<br>Sworn, Katie; University of Sheffield, Health Economics and Decision Science, School of Health and Related Research<br>Turner, Katrina; University of Bristol, School of Social and Community Medicine<br>Yardley, Lucy; University of Southampton, Psychology; University of Bristol, School of Health Sciences<br>Hoddinott, Pat; University of Stirling, Nursing, Midwifery and Allied Health Professional Research Unit |
| <b>Primary Subject Heading</b>: | Research methods                                                                                                                                                                                                                                                                                                                                                                                                                                                                                                                                                                                                                                         |
| Secondary Subject Heading:      | Public health, Health services research                                                                                                                                                                                                                                                                                                                                                                                                                                                                                                                                                                                                                  |
| Keywords:                       | intervention development, guidance, health                                                                                                                                                                                                                                                                                                                                                                                                                                                                                                                                                                                                               |
|                                 |                                                                                                                                                                                                                                                                                                                                                                                                                                                                                                                                                                                                                                                          |

SCHOLARONE™  
Manuscripts

### **Guidance on how to develop complex interventions to improve health and health care**

\*Alicia O’Cathain University of Sheffield School of Health and Related Research, Sheffield, UK,  
Professor

Liz Croot, School of Health and Related Research (SchARR), University of Sheffield, Senior Research  
Fellow

Ed Duncan, NMAHP Research Unit, University of Stirling, Associate Professor

Nikki Rousseau NMAHP Research Unit, University of Stirling, Research Fellow

Katie Sworn, School of Health and Related Research (SchARR), University of Sheffield, Research  
Associate

Katrina Turner, Population Health Sciences, University of Bristol, Reader

Lucy Yardley, School of Psychological Sciences, University of Bristol, Professor

Pat Hoddinott, NMAHP Research Unit, University of Stirling, Professor

\*Corresponding author: a.ocathain@sheffield.ac.uk

The Corresponding Author has the right to grant on behalf of all authors and does grant on behalf of all authors, an exclusive licence on a worldwide basis to the BMJ Publishing Group Ltd to permit this article (if accepted) to be published in BMJ editions and any other BMJ PGL products and sublicences such use and exploit all subsidiary rights, as set out in our licence.

All authors have completed the Unified Competing Interest form (available on request from the corresponding author) and declare: financial support from Medical Research Council and NIHR for this study; no financial relationships with any organisations that might have an interest in the submitted work in the previous three years, no other relationships or activities that could appear to have influenced the submitted work.

## Abstract

Objective: To provide researchers with guidance on actions to take during intervention development.

Summary of key points: Based on a consensus exercise informed by reviews and qualitative interviews, we present key principles and actions for consideration when developing interventions to improve health. These include seeing intervention development as a dynamic iterative process, involving stakeholders, reviewing published research evidence, drawing on existing theories, articulating programme theory, undertaking primary data collection, understanding context, paying attention to future implementation in the real world, and designing and refining an intervention using iterative cycles of development with stakeholder input throughout.

Conclusion: Researchers should consider each action by addressing its relevance to a specific intervention in a specific context, both at the start and throughout the development process.

## Introduction

There is increasing demand for new interventions as policymakers and clinicians grapple with complex challenges, such as integration of health and social care, risk associated with lifestyle behaviours, multi-morbidity and the use of e-health technology. Complex interventions are often required to address these challenges. Complex interventions can have a number of interacting components, require new behaviours by those delivering or receiving the intervention, or have a variety of outcomes.[1] An example is a multicomponent intervention to help people stand more at work, including a height adjustable workstation, posters, and coaching sessions.[2] Careful development of complex interventions is necessary so that new interventions have a better chance of being effective when evaluated, and being adopted widely in the real world. Researchers, the public, patients, industry, charities, care providers including clinicians, and policy makers can all be involved in the development of new interventions to improve health, and all have an interest in how best to do this.

The United Kingdom Medical Research Council (UK MRC) published influential guidance on developing and evaluating complex interventions, presenting a framework of four phases: development, feasibility/piloting, evaluation, and implementation.[1] The development phase is what happens between the idea for an intervention and formal pilot testing in the next phase.[3] This phase was only briefly outlined in the original MRC guidance and requires extension to offer more help to researchers wanting to develop complex interventions. Bleijenberg and colleagues (2018) brought together learning from a range of guides/published approaches to intervention development to enrich the MRC framework.[4] There are also multiple sources of guidance to intervention development, embodied in books and journal articles about different approaches to intervention development (for example[5]), and overviews of the different approaches.[6] These approaches and overviews may offer conflicting advice and it is timely to gain consensus on key aspects of intervention development to help researchers to focus on this endeavour. Here we present guidance on intervention development based on a consensus study which we describe below. We present this guidance as an accessible communication article on how to do intervention development, which is aimed at readers who are developers, including those new to the endeavour. We do not present it as a "Research Article" with methods and findings in order to maximise its

1  
2  
3 utility as guidance. Lengthy detail and a long list of references are not provided so that the guidance  
4 is focused and user friendly. In addition, the key actions of intervention development are  
5 summarised in a single table so that funding panel members and developers can use this as a quick  
6 reference point of issues to consider when developing health interventions.  
7

### 8 **How this guidance was developed**

9  
10 This guidance is based on a study funded by the MRC and the National Institute for Health Research  
11 in the UK, with triangulation of evidence from three sources. First, we undertook a review of  
12 published approaches to intervention development that offer developers guidance on specific ways  
13 to develop interventions,[6] and a review of primary research reporting intervention development.  
14 The next two phases involved developers and wider stakeholders. Developers were people who had  
15 written articles or books detailing different approaches to developing interventions, and people who  
16 had developed interventions. Wider stakeholders were people involved in the wider intervention  
17 development endeavour in terms of being directors of research funding panels, editors of journals  
18 that had published intervention development studies, people who had been public and patient  
19 involvement members of studies involving intervention development, and people working in health  
20 service implementation. We carried out qualitative interviews [7] and then we conducted a  
21 consensus exercise consisting of two simultaneous and identical e-Delphi studies distributed to  
22 intervention developers and wider stakeholders respectively, and followed this with a consensus  
23 workshop. We generated items for the e-Delphi studies based on our earlier reviews and analysis of  
24 interview data and asked participants to rate 85 items on a five point scale from 'very' to 'not  
25 important' using the question 'when developing complex interventions to improve health, how  
26 important is it to'. The distribution of answers to each item is displayed in Appendix 1 and e-Delphi  
27 participants are described in Appendix 2. In addition to these research methods we convened an  
28 international expert panel with members from the UK, United States of America and Europe early in  
29 the project to guide the research. Members of this expert panel participated in the e-Delphi studies  
30 and consensus workshop alongside other participants.  
31  
32  
33  
34  
35

### 36 **Framework for intervention development**

37  
38 We base this guidance on expert opinion because there is a research evidence gap about which  
39 actions are needed in intervention development to produce successful health interventions.  
40 Systematic reviews have been undertaken to determine whether following a specific published  
41 approach, or undertaking a specific action, results in effective interventions. Unfortunately this  
42 evidence base is sparse in the field of health, largely due to the difficulty of empirically addressing  
43 this question.[8,9] Evidence tends to focus on the use of existing theory within intervention  
44 development – for example the theory of Diffusion of Innovation, or theories on behaviour change -  
45 and a review of reviews shows that interventions developed with existing theory do not result in  
46 more effective interventions than those not using existing theory.[10] The authors of this latter  
47 review highlight problems with the evidence base rather than dismiss the possibility that existing  
48 theory could help produce successful interventions.  
49  
50  
51

52 Key principles and actions of intervention development are summarised below. More detailed  
53 guidance for the principles and actions is available at  
54 <https://www.sheffield.ac.uk/scharr/sections/hsr/mcru/indexstudy>.  
55

#### 56 Key principles of intervention development

57  
58 Key principles of intervention development are that it is dynamic, iterative, creative, open to change,  
59 and forward looking to future evaluation and implementation. Developers are likely to move  
60

backwards and forwards dynamically between overlapping actions within intervention development, such as reviewing evidence, drawing on existing theory and working with stakeholders. There will also be iterative cycles of developing a version of the intervention: getting feedback from stakeholders to identify problems, implementing potential solutions, assessing their acceptability, and starting the cycle again until assessment of later iterations of the intervention produces few changes. These cycles will involve using quantitative and qualitative research methods to measure processes and intermediate outcomes, and assess the acceptability, feasibility, desirability and potential unintended harms of the intervention.

Developers may start the intervention development with strong beliefs about the need for the intervention, its content or format, or how it should be delivered. They may also believe that it is possible to develop an intervention with a good chance of being effective, or that it can only do good not harm. Being open to alternative possibilities throughout the development process may lead to abandoning the endeavour or taking steps back as well as forward. The rationale for being open to change is that this may reduce the possibility of developing an intervention that fails during future evaluation or is never implemented in practice. Developers may also benefit from looking forward to how the intervention will be evaluated so they can make plans for this, and identify learning and key uncertainties to be addressed in future evaluation.

#### Key actions of intervention development

Key actions for developers to consider are summarised in Table 1 and explored in more detail throughout the rest of the paper. It may not be possible or desirable for developers to address all these actions during their development process, and indeed some may not be relevant to every problem or context. The recommendation made here is that developers *consider the relevance and importance of these actions to their situation both at the start of, and throughout, the development process.*

These key actions are set out in Table 1 in what appears to be a sequence. However, in practice these actions are addressed in a dynamic way. That is, undertaken in parallel and revisited regularly as the intervention evolves, or they interact with each other when learning from one action influences plans for other actions. These actions are explored in more detail below and presented in a logic model for intervention development (Figure 1). A logic model is a diagram of how an intervention is proposed to work, showing mechanisms by which an intervention influences the proposed outcomes.[11] The short and long term effects of successful intervention development were informed by the qualitative interviews with developers and wider stakeholders.[7]

**Table 1 Framework of actions for intervention development**

| Action                       | Consider the relevance and importance of the following...                                                                                                                                                     |
|------------------------------|---------------------------------------------------------------------------------------------------------------------------------------------------------------------------------------------------------------|
| Plan the development process | Identify the problem to be targeted and refine understanding of it throughout the process<br><br>Assess whether the problem is a priority<br><br>Consider which aspects of the problem are amenable to change |

|                                                                                               |                                                                                                                                                                                                                                                                                                                                                                                                                                                                                                                                                                                                                                                                                                                                                                                  |
|-----------------------------------------------------------------------------------------------|----------------------------------------------------------------------------------------------------------------------------------------------------------------------------------------------------------------------------------------------------------------------------------------------------------------------------------------------------------------------------------------------------------------------------------------------------------------------------------------------------------------------------------------------------------------------------------------------------------------------------------------------------------------------------------------------------------------------------------------------------------------------------------|
|                                                                                               | <p>Ask whether a new intervention is really needed and if the potential benefit of the new intervention justifies the cost of development</p> <p>Determine the time needed to undertake intervention development</p> <p>Obtain sufficient resources/funding for the intervention development study</p> <p>Draw on one or more of the many published intervention development approaches, recognising that there is no evidence about which approach is best, and apply flexibly depending on the problem and context</p> <p>Involve stakeholders during the planning process (see next Action)</p> <p>Produce a protocol detailing the processes to be undertaken to develop the intervention</p>                                                                                |
| Involve stakeholders, including those who will deliver, use and benefit from the intervention | <p>Work closely with relevant stakeholders throughout the development process: patients, the public, the target population, service providers, those who pay for health and social services or interventions, policy makers, and intervention design specialists</p> <p>Develop a plan at the start of the process to integrate public and patient involvement into the intervention development process</p> <p>Identify the best ways of working with each type of stakeholder, from consultation through to co-production, acknowledging that different ways may be relevant for different stakeholders at different times</p> <p>Use creative activities within team meetings to work with stakeholders to understand the problem and generate ideas for the intervention</p> |
| Bring together a team and establish decision making processes                                 | <p>Include within the development team individuals with relevant expertise: in the problem to be addressed by the intervention including those with personal experience of the problem, in behaviour change when the intervention aims to change behaviour, in maximising engagement of stakeholders, and with a strong track record in designing complex interventions</p> <p>It may be hard to make final decisions about the content, format and delivery of the intervention, so only some team members may do this. There is no consensus about the size or constituency of the team that makes these final decisions, but it is important early on to agree a process for making decisions within the team</p>                                                             |
| Review published research evidence                                                            | <p>Review published research evidence before starting to develop the intervention and throughout the development process e.g. to identify existing interventions, to understand the evidence base for each proposed substantive intervention component</p> <p>Look for, and take into account, evidence that the proposed intervention may not work in the way intended</p>                                                                                                                                                                                                                                                                                                                                                                                                      |
| Draw on existing theories                                                                     | <p>Identify an existing theory or framework of theories to inform the intervention at the start of the process e.g. behaviour change or implementation theory</p>                                                                                                                                                                                                                                                                                                                                                                                                                                                                                                                                                                                                                |



|                                                                              |                                                                                                                                                                                                                                                                                                                                                                                                                                                                                                                                                                                                                                                                                                                                       |
|------------------------------------------------------------------------------|---------------------------------------------------------------------------------------------------------------------------------------------------------------------------------------------------------------------------------------------------------------------------------------------------------------------------------------------------------------------------------------------------------------------------------------------------------------------------------------------------------------------------------------------------------------------------------------------------------------------------------------------------------------------------------------------------------------------------------------|
|                                                                              | Where relevant, draw on more than one existing theory or framework of theories e.g. both psychological and organisational theories                                                                                                                                                                                                                                                                                                                                                                                                                                                                                                                                                                                                    |
| Articulate programme theory                                                  | Develop a programme theory. The programme theory may draw on existing theories. Aspects of the programme theory can be represented by a logic model or set of models<br><br>Test and refine the programme theory throughout the development process                                                                                                                                                                                                                                                                                                                                                                                                                                                                                   |
| Undertake primary data collection                                            | Use a wide range of research methods throughout e.g. qualitative research to understand the context in which the intervention will operate, quantitative methods to measure change in intermediate outcomes                                                                                                                                                                                                                                                                                                                                                                                                                                                                                                                           |
| Understand context                                                           | Understand the context in which the intervention will be implemented. Context may include population and individuals; physical location or geographical setting; social, economic, cultural and political influences; and factors affecting implementation e.g. organisation, funding, policy                                                                                                                                                                                                                                                                                                                                                                                                                                         |
| Pay attention to future implementation of the intervention in the real world | From the start, understand facilitators and barriers to reaching the relevant population, future use of the intervention, 'scale up' and sustainability in real world contexts                                                                                                                                                                                                                                                                                                                                                                                                                                                                                                                                                        |
| Design and refine the intervention                                           | Generate ideas about content, format, and delivery with stakeholders<br><br>Once an early version or prototype of the intervention is available, refine or optimise it using a series of iterations. Each iteration includes an assessment of how acceptable, feasible and engaging the intervention is, including potential harms and unintended consequences, resulting in refinements to the intervention. Repeat the process until uncertainties are resolved<br><br>Check that the proposed mechanisms of action are supported by early testing                                                                                                                                                                                  |
| End the development phase                                                    | There are no established criteria for stopping the intensive development phase and moving on to the feasibility/pilot or evaluation phases. The concepts of data saturation and information power may be useful when assessment of later iterations of the intervention produces few changes<br><br>Describe the intervention to facilitate transferability of an intervention outside the original team and location in which it was developed<br><br>Write up the intervention development process so that judgements can be made about the quality of the process, links can be made in the future between intervention development processes and the subsequent success of interventions, and others can learn how it can be done |

**Figure 1 Logic model for intervention development – insert here**

**Plan the development process**

Understand the problem

1  
2  
3 Developers usually start with a problem they want to solve. They may also have some initial ideas  
4 about the content, format or delivery of the proposed intervention. The knowledge about the  
5 problem and the possibilities for an intervention may be based on: personal experiences of the  
6 problem (patients, carers or members of the public); their work (practitioners, policy makers,  
7 researchers); published research or theory; or discussions with stakeholders. These early ideas about  
8 the intervention may be refined and indeed challenged throughout the intervention development  
9 process. For example, understanding the problem, priorities for addressing it, and the aspects that  
10 are amenable to change, is part of the development process, and different solutions may emerge as  
11 understanding increases. In addition, developers may find that it is not necessary to develop a new  
12 intervention because effective or cost-effective ones already exist. It may not be worth developing a  
13 new intervention because the potential cost is likely to outweigh the potential benefits, or its limited  
14 reach could increase health inequalities, or the current context may not be conducive to using it.  
15 Health economists may contribute to this debate.  
16  
17  
18  
19  
20

### 21 Identify resources – time and funding

22  
23 Once a decision has been made that a new intervention is necessary, and has the potential to be  
24 worthwhile, developers can consider the resources available to them. Spending too little time  
25 developing an intervention may result in a flawed intervention that is later found not to be effective  
26 or cost-effective or is not implemented in practice, resulting in research waste. Alternatively,  
27 spending too much time on development could also waste resources by leaving developers with an  
28 outdated intervention that is no longer acceptable or feasible to deliver because the context has  
29 changed so much, or is no longer a priority. It is likely that a highly complex problem with a history of  
30 failed interventions will warrant more time for careful development.  
31  
32

33 Some funding bodies fund standalone intervention development studies or fund this endeavour as  
34 part of a programme of development, piloting and evaluation of an intervention. While pursuing  
35 such funding may be desirable to ensure sufficient resource, in practice some developers may not be  
36 able to access this funding and may have to fund different parts of the development process from  
37 separate pots of money over a number of years.  
38  
39

40 Applying for funding requires writing a protocol for a study. Funders need detail about the proposed  
41 intervention and the development process in order to make a funding decision. It may feel difficult  
42 to specify the intervention and the detail of its development before starting because these will  
43 depend on learning occurring throughout the development process. Developers can address this by  
44 describing in detail their best guess of the intervention and their planned development process,  
45 recognising that both are likely to change in practice. Even if funding is not sought, it may be a good  
46 idea to produce a protocol detailing the processes to be undertaken to develop the intervention so  
47 that sufficient resources can be identified.  
48  
49

### 50 Decide which approach to intervention development to take

51  
52 A key decision for teams is whether to be guided by one of the many published approaches to  
53 intervention development, or undertake a more pragmatic self-selected set of actions. A published  
54 approach is a guide to the process and methods of intervention development set out in a book,  
55 website or journal article. The rationale for using a published approach is that it sets out systematic  
56 processes that other developers have found useful. Some published approaches, and approaches  
57 that developers have used in practice, are listed in Table 2.[6] No research has shown that one of  
58 these approaches is better than another, or that their use always leads to the development of  
59  
60

successful interventions. In practice, developers may select a specific published approach because of the purpose of their intervention development, e.g. aiming to change behaviour might lead to the use of the Behaviour Change Wheel or Intervention Mapping, in conjunction with the Person Based Approach. Alternatively, selection may depend on developers' beliefs or values, e.g. partnership approaches such as co-production may be selected because developers believe that users will find the resultant interventions more acceptable and feasible, or they may value inclusive work practices in their own right. Although developers may follow a published approach closely, experts recommend that developers apply these approaches flexibly to fit their specific context. Many of these approaches share the same actions [4,6] and simply place more emphasis on one or a sub-set of actions. Researchers sometimes combine the use of different approaches in practice to gain the strengths of two approaches, as in the 'Combination' category of Table 2.

**Table 2 Different approaches to intervention development**

| Category                    | Definition                                                                                                                                                                                                              | Examples of approaches*                                                                                                                                                                             |
|-----------------------------|-------------------------------------------------------------------------------------------------------------------------------------------------------------------------------------------------------------------------|-----------------------------------------------------------------------------------------------------------------------------------------------------------------------------------------------------|
| 1.Partnership               | The people whom the intervention aims to help are involved in decision-making about the intervention throughout the development process, having at least equal decision-making powers with members of the research team | Co-production, co-creation, co-design; user-driven; Experience-based co-design (EBCD); Community Based Participatory Research                                                                       |
| 2.Target population-centred | Interventions are based on the views and actions of the people who will use the intervention                                                                                                                            | Person-based; User-centred; Human-centred design                                                                                                                                                    |
| 3.Theory and evidence-based | Interventions are based on combining published research evidence and existing theories e.g. psychological or organisational theories                                                                                    | MRC Framework for developing and evaluating complex interventions; Behaviour Change Wheel (BCW); Intervention mapping (IM); Normalisation Process Theory (NPT); Theoretical Domains Framework (TDF) |
| 4. Implementation-based     | Interventions are developed with attention to ensuring the intervention will be used in the real world if found to be effective at the evaluation phase                                                                 | Reach, Effectiveness, Adoption, Implementation, Maintenance (RE-AIM)                                                                                                                                |
| 5. Efficiency based         | Components of an intervention are tested using experimental designs to determine active components and make interventions more efficient                                                                                | Multiphase Optimization Strategy (MOST)                                                                                                                                                             |
| 6. Stepped or phased        | Interventions are developed through emphasis on a systematic and sequential set of processes involved in intervention development                                                                                       | Six essential Steps for Quality Intervention Development (6SQUID); Five actions model; Obesity Related Behavioral Intervention Trials (ORBIT)                                                       |
| 7.Intervention-specific     | An intervention development approach is constructed for a specific type of intervention                                                                                                                                 | Digital (e.g. Integrate, Design, Assess and Share (IDEAS)); Patient decision support aids                                                                                                           |
| 8. Combination              | Published approaches to intervention development are combined                                                                                                                                                           | Participatory Action Research based on theories of Behaviour Change and Persuasive Technology (PAR –BCP)                                                                                            |
| 9. Pragmatic                | Developers use a self-selected set of actions                                                                                                                                                                           | Sometimes framed as mixed methods or formative evaluation                                                                                                                                           |

\*see reference [6] for references and examples

### Involve stakeholders throughout the development process

Many groups of people are likely to have a stake in the proposed intervention: the intervention may be aimed at patients or the public, or they may be expected to use the intervention; practitioners may deliver the intervention in a range of settings, e.g. hospitals, primary care, community care, social care, schools, communities, voluntary/third sector organisations; and users, policy makers or

1  
2  
3 tax payers may pay for the intervention. The rationale for involving relevant stakeholders from the  
4 start, and indeed working closely with them throughout, is that they can help to identify priorities,  
5 understand the problem and help find solutions that may make a difference to future  
6 implementation in the real world.  
7

8  
9 There are many ways of working with stakeholders and different ways may be relevant for different  
10 stakeholders at different times during the development process. Consultation may sometimes be  
11 appropriate, where a one-off meeting with a set of stakeholders helps developers to understand the  
12 context of the problem or the context in which the intervention would operate. Alternatively, the  
13 intervention may be designed closely with stakeholders using a co-production process, where  
14 stakeholders and developers generate ideas about potential interventions and make decisions  
15 together throughout the development process about its content, format, style and delivery.[12] This  
16 could involve a series of workshops and meetings to build relationships over time to facilitate  
17 understanding of the problem and generation of ideas for the new intervention. Co-production  
18 rather than consultation is likely to be important when buy-in is needed from a set of stakeholders  
19 to facilitate the feasibility, acceptability and engagement with the intervention, or the health  
20 problem or context is particularly complex. Co-production involves stakeholders in this decision-  
21 making whereas with consultation, decisions are made by the research team. Stakeholders' views  
22 may also be obtained through qualitative interviews, surveys and stakeholder workshops, with  
23 methods tailored to the needs of each stakeholder. Innovative activities can be used to help engage  
24 stakeholders, for example: creative sessions facilitated by a design specialist might involve imagining  
25 what versions of the new intervention might look like if designed by various well known global  
26 manufacturers, or creating a patient persona to help people think through the experiences of  
27 receiving an intervention. As well as participating in developing the intervention, stakeholders can  
28 help to shape the intervention development process itself. Members of the public, patients and  
29 service users are key stakeholders and experts recommend planning to integrate their involvement  
30 into the intervention development process from the start.  
31  
32  
33  
34  
35  
36  
37

### 38 **Bring together a team and establish decision making processes**

39  
40 Developers may choose to work within any size of team. Small teams can reach out to stakeholders  
41 at different points in the development process. Alternatively, large teams may include all the  
42 necessary expertise. Experts recommend including: experts in the problem to be addressed by the  
43 intervention; individuals with a strong track record in developing complex interventions; a behaviour  
44 change scientist when the intervention aims to change behaviour; and people who are skilled at  
45 maximising engagement of stakeholders. Other possible team members include experts in  
46 evaluation methods and economics. Within a co-production approach to development, key  
47 stakeholders participate as equal partners with researchers. Large teams can generate ideas and  
48 ensure all the relevant skills are available but may also increase the risk of conflicting views and  
49 difficulties when making decisions about the final intervention. There is no consensus on the size of  
50 team to have, but experts think it is important to agree a process for making decisions. In particular,  
51 experts recommend that team members understand their roles, rights and responsibilities;  
52 document the reasons for decisions made; and are prepared to test different options where there  
53 are team disagreements.  
54  
55  
56  
57  
58

### 59 **Review published research evidence**

1  
2  
3 Reviewing published research evidence before starting to develop an intervention can help to define  
4 the health problem and its determinants, understand the context in which the problem exists, clarify  
5 who the intervention should be aimed at, identify whether effective or cost-effective interventions  
6 already exist for the target population/ setting/problem, identify facilitators and barriers to  
7 delivering interventions in this context, and identify key uncertainties that need to be addressed  
8 using primary data collection. Continuing to review evidence throughout the process can help to  
9 address uncertainties that arise, for example if a new substantive intervention component is  
10 proposed then the research evidence about it can be explored. Evidence can change quickly, and  
11 keeping up with it by reviewing literature can alert developers to new relevant interventions that  
12 have been found to be effective or cost effective. Developers may be tempted to look for evidence  
13 that supports existing ideas and plans, but should also look for, and take into account, evidence that  
14 the proposed intervention may not work in the way intended. Undertaking systematic reviews is not  
15 always necessary because there may be recent relevant reviews available. Nor is it always possible in  
16 the context of tight resources available to the development team. However undertaking some  
17 review is important for ensuring that there are no existing interventions that would make the one  
18 under development redundant.

### 23 **Draw on existing theories**

24  
25 Some developers call their approaches to intervention development 'theory based' when they draw  
26 on psychological, sociological, organisational or implementation theories, or frameworks of theories,  
27 to inform their intervention.[6] The rationale for drawing on existing theories is that they can help to  
28 identify what is important, relevant and feasible to inform the intended goals of the  
29 intervention,[13] and inform the content and delivery of any intervention. It may be relevant to  
30 draw on more than one existing theory. Experts recommend considering which theories are relevant  
31 at the start of the development process. However, the utility of theories may need to be kept under  
32 scrutiny since in practice some developers have found that their selected theory proved difficult to  
33 apply during the development process.

### 36 **Articulate programme theory**

37  
38 A programme theory describes how a specific intervention is expected to lead to its effects and  
39 under what conditions.[14] It shows the causal pathways between the content of the intervention,  
40 intermediate outcomes and long term goals, and how these interact with contextual factors.  
41 Articulating programme theory at the start of the development process can help to communicate to  
42 funding agencies and stakeholders how the intervention will work. Existing theories may inform this  
43 programme theory. Logic models can be drawn to communicate different parts of the programme  
44 theory such as the causes of a problem, or the mechanisms by which an intervention will achieve  
45 outcomes, to both team members and external stakeholders. Figure 1 is an example of a logic  
46 model. The programme theory and logic models are not static. They should be tested and refined  
47 throughout the development process using primary and secondary data collection and stakeholder  
48 input. Indeed they are advocated for use in process evaluations alongside outcome evaluations in  
49 the recent MRC Guidance on process evaluation.[15]

### 53 **Undertake primary data collection**

54  
55 Primary data collection, usually involving mixed methods, can be used for a range of purposes  
56 throughout the intervention development process. Reviewing the evidence base may identify key  
57 uncertainties that primary data collection can then address. Non-participant observation can be  
58 used to understand the setting in which the intervention will be used. Qualitative interviews with  
59  
60

1  
2  
3 the target population or patient group can identify what matters most to people, their lived  
4 experience, or why people behave as they do. 'Verbal protocol', which involves users of an  
5 intervention talking aloud about it as they use it,[16] can be undertaken to understand the usability  
6 of early versions of the intervention. Pre-test post-test measures may be taken of intermediate  
7 outcomes to begin early testing of some aspects of the programme theory, an activity that will  
8 continue into the feasibility and evaluation phases of the MRC framework and may lead to changes  
9 to the programme theory. Surveys, discrete choice experiments, or qualitative interviews can be  
10 used to assess the acceptability, values and priorities of those delivering and receiving the  
11 intervention.  
12  
13

### 14 **Understand the context**

15  
16 Recent guidance on context in population health intervention research identifies a breadth of  
17 features including those relating to population and individuals; physical location or geographical  
18 setting; social, economic, cultural and political influences; and factors affecting implementation, e.g.  
19 organisation, funding, policy.[17] An important context is the specific setting in which the  
20 intervention will be used, for example within a busy emergency department or within people's homes.  
21 The rationale for understanding this context, and developing interventions which can operate within  
22 it, is to avoid developing interventions that fail during later evaluation because too few people  
23 deliver or use them. Context also includes the wider complex health and social care, societal or  
24 political systems within which any intervention will operate.[18] Different approaches can be taken  
25 to understand context, including reviews of evidence, stakeholder engagement and primary data  
26 collection. A challenge of understanding context is that it may change rapidly over the course of the  
27 development process.  
28  
29  
30

### 31 **Pay attention to future implementation of the intervention in the real world**

32  
33 The end goal of developers or those who fund development is real-world implementation rather  
34 than simply the development of an intervention that is shown to be effective or cost-effective in a  
35 future evaluation.[7] Many interventions do not lead to change in policy or practice, and it is  
36 important that effective interventions inform policy and are eventually used in the real world to  
37 improve health and care. To achieve this goal, developers may pay attention early on in the  
38 development process to factors that might affect use of the intervention, 'scale up' of the  
39 intervention for use nationally or internationally, and sustainability. For example, consideration of  
40 the cost of the intervention at an early stage, including as stakeholders official bodies or policy  
41 makers that would endorse or accredit the intervention, or addressing the challenges of training  
42 practitioners in delivering the intervention, may help its future implementation. Implementation-  
43 based approaches to intervention development are listed in Table 2. Some other approaches listed  
44 in this table, such as the Normalisation Process Theory, also emphasise implementation in the real  
45 world.  
46  
47  
48  
49

### 50 **Design and refine the intervention**

51  
52 The term 'design' is sometimes used interchangeably with the term 'development'. However, it is  
53 useful to see design as a specific creative part of the development process where ideas are  
54 generated, and decisions are made about the intervention components and how it will be delivered,  
55 by whom, and where. Design starts with generation of ideas about the content, format, style and  
56 delivery of the proposed intervention. The process of design may use creative ways of generating  
57 ideas, for example using games or physically making rough prototypes. Some teams include experts  
58 in design or use designers external to the team when undertaking this action. The rationale for a  
59  
60

1  
2  
3 wide-ranging and creative design process is to identify innovative and workable ideas that may not  
4 otherwise have been considered.  
5

6 After generating ideas, a mock up or prototype of the intervention or a key component may be  
7 created to allow stakeholders to offer views on it. Once an early version or prototype of the  
8 intervention is available, it can be refined (sometimes called optimised) using a series of rapid  
9 iterations where each iteration includes an assessment of how acceptable, feasible and engaging the  
10 intervention is, leading to cycles of refinements. The programme theory and logic models are  
11 important at this point and developers may test whether some of their proposed mechanisms of  
12 action are impacting on intermediate outcomes if statistical power allows. The rationale for  
13 spending time on multiple iterations is that problems can be identified and solutions found prior to  
14 any expensive future feasibility or evaluation phase. Some experts take a quantitative approach to  
15 optimisation of an intervention, specifically the Multiphase Optimization Strategy (MOST) in Table 2,  
16 but not all experts agree that this is necessary.  
17  
18  
19

### 20 **End the development phase**

21  
22 Seeing this endeavour as a discrete 'intervention development phase' that comes to an end may feel  
23 artificial. In practice there is overlap between some actions taken in the development phase and the  
24 feasibility phase of the MRC framework,[1] such as consideration of acceptability and some  
25 measurement of change in intermediate outcomes. Developers may return to the intervention  
26 development phase if findings from the feasibility phase identify significant problems with the  
27 intervention. In many ways, development never stops because developers will continue to learn  
28 about the intervention, and refine it, during the later pilot/feasibility, evaluation and  
29 implementation phases. The intention may be that some types of intervention continuously evolve  
30 during evaluation and implementation, which may reduce the amount of time spent on the  
31 development phase. However, developers need to decide when to stop that first intensive  
32 development phase, either in terms of abandoning the intervention because pursuing it is likely to  
33 be futile, or moving on to the next phase of feasibility/piloting testing or full evaluation. They also  
34 face the challenge of convincing potential funders of an evaluation that enough development has  
35 occurred to risk spending resources on its pilot or evaluation. The decision to end the development  
36 phase may be partly informed by practicalities, such as the amount of time and money available, and  
37 partly by the concept of data saturation (used in qualitative research) in that the intensive process  
38 stops when few refinements are suggested by those delivering or using the intervention during its  
39 period of refinement, or these and other stakeholders indicate that the intervention feels  
40 appropriate to them.  
41  
42  
43  
44

45  
46 At the end of the development process, policy makers, developers or service providers external to  
47 the original team may want to implement or evaluate the intervention. Describing the intervention,  
48 using one of the relevant reporting guidelines such as TIDieR (Template for Intervention Description  
49 and Replication) Checklist, [19] and producing a manual or document that describes the training as  
50 well as content of the intervention, can facilitate this. This information can be made available on a  
51 website, and, for some digital interventions, the intervention itself can be made available. It is  
52 helpful to publish the intervention development process because it allows others to make links in  
53 the future between intervention development processes and the subsequent success of  
54 interventions, and learn about intervention development endeavours. Publishing failed attempts to  
55 develop an intervention, as well as those that produce an intervention, may help to reduce research  
56 waste. Reporting multiple, iterative and interacting processes in these articles is challenging,  
57 particularly in the context of limited word count for some journals. It may be necessary to publish  
58  
59  
60

1  
2  
3 more than one paper to describe the development if multiple lessons have been learnt for future  
4 development studies.  
5  
6  
7

## 8 **Conclusions**

9  
10 This guidance on intervention development presents a set of principles and actions for future  
11 developers to consider throughout the development process. There is insufficient research evidence  
12 to recommend that a particular published approach or set of actions is essential to produce a  
13 successful intervention. Some aspects of the guidance may not be relevant to some interventions or  
14 contexts, and not all developers are fortunate enough to have a large amount of resource available  
15 to them, so a flexible approach to using the guidance is required. The best way to use the guidance is  
16 to consider each action by addressing its relevance to a specific intervention in a specific context,  
17 both at the start and throughout the development process.  
18  
19  
20  
21  
22  
23

24 **Contributors:** AOC and PH led the development of the guidance, wrote the first draft of the article,  
25 and the full guidance document which it describes, and integrated contributions from the author  
26 group into subsequent drafts. All authors contributed to the design and content of the guidance and  
27 subsequent drafts of the paper (AOC, PH, LY, LC, KT, NR, ED, KS). The guidance is based on reviews  
28 and primary research. AOC led the review of different approaches to intervention development  
29 working with KS. LC led the review of primary research working with KS. PH led the qualitative  
30 interview study working with NR, KT and ED. ED led the consensus exercise working with NR. AOC  
31 acts as guarantor.  
32  
33  
34  
35  
36  
37  
38  
39

40 **Funding:** MRC-NIHR Methodology Research Panel (MR/N015339/1). Funders had no influence on  
41 the guidance presented here. The authors were fully independent of the funders.  
42  
43  
44  
45

46 **Competing interests:** All authors have read and understood BMJ Group policy on declaration of  
47 interests and have no relevant interests to declare.  
48  
49  
50  
51

52 **Acknowledgements:** This guidance is based on secondary and primary research. Many thanks to  
53 participants in the e-Delphis, consensus conference and qualitative interviews; to members of our  
54 Expert Panel; and to people who attended workshops discussing this guidance. The researchers  
55 leading the update of the MRC guidance on developing and evaluating interventions, due to be  
56 published later this year, also offered insightful comments on our guidance to facilitate fit between  
57 the two sets of guidance.  
58  
59  
60

## 61 **References**

- 62 1. Craig P, Dieppe P, Macintyre S, et al. Developing and evaluating complex interventions: the new  
63 Medical Research Council guidance. *BMJ* 2008;337:a1655. doi: 10.1136/bmj.a1655
- 64 2. Edwardson C, Yates T, Biddle S, et al. Effectiveness of the Stand More AT (SMaRT) Work  
65 intervention: cluster randomised controlled trial. *BMJ* 2018;363:k3870. doi:  
66 10.1136/bmj.k3870



- 1  
2  
3 3. Hoddinott P. A new era for intervention development studies. *Pilot Feasibility Stud* 2015;1(36):1-4.  
4 doi: 10.1186/s40814-015-0032-0
- 5  
6 4. Bleijenberg, de Man-van Ginkel JM, Trappenburg JCA, et al. Increasing value and reducing waste  
7 by optimizing the development of complex interventions: Enriching the development phase  
8 of the Medical Research Council (MRC) Framework. *International Journal of Nursing Studies*  
9 2018;79: 86-93.
- 10  
11 5. Bartholomew Eldredge LK, Parcel GS, Kok G, et al. Planning Health Promotion Programmes: An  
12 Intervention Mapping Approach. 3rd ed. San Francisco, CA, USA: John Wiley & Sons 2011.
- 13  
14 6. O’Cathain A, Croot L, Sworn K, et al. Taxonomy of approaches to developing interventions to  
15 improve health: a systematic methods overview. *Pilot Feasibility Stud* 2019; 5:41
- 16  
17 7. Turner KM, Rousseau N, Croot L, et al. Understanding successful development of complex health  
18 and healthcare interventions and its drivers from the perspectives of developers and wider  
19 stakeholders: an international qualitative interview study. *BMJ Open* 2019;9:e028756.  
20 doi:10.1136/bmjopen-2018-028756
- 21  
22 8. Garba R, Gadanya M. The role of intervention mapping in designing disease prevention  
23 interventions: A systematic review of the literature. *PLoS One* 2017;12(3):e0174438. doi:  
24 10.1371/journal.pone.0174438
- 25  
26 9. Clarke D, Jones F, Harris R, et al. What outcomes are associated with developing and  
27 implementing co-produced interventions in acute healthcare settings? A rapid evidence  
28 synthesis. *BMJ Open* 2017;7(7):e014650. doi: 10.1136/bmjopen-2016-014650
- 29  
30 10. Dalgetty R, Miller CB, Dombrowski SU. Examining the theory-effectiveness hypothesis: A  
31 systematic review of systematic reviews. *British Journal of Health Psychology* 2019;24: 334–  
32 356
- 33  
34 11. W K Kellogg Foundation. *Logic Model Development Guide*, 2004 Available from:  
35 <https://www.bttop.org/sites/default/files/public/W.K.%20Kellogg%20LogicModel.pdf>  
36 [Access Date 30.11.2018].
- 37  
38 12. INVOLVE. *Guidance on co-producing a research project*, 2018 Available from:  
39 [http://www.invo.org.uk/wp-content/uploads/2018/03/Copro\\_Guidance\\_Mar18.pdf](http://www.invo.org.uk/wp-content/uploads/2018/03/Copro_Guidance_Mar18.pdf) [Access  
40 Date 30.11.2018].
- 41  
42 13. Davidoff F, Dixon-Woods M, Leviton L, et al. Demystifying theory and its use in improvement.  
43 *BMJ Qual Saf* 2015;24(3):228-38. doi: 1136/bmjqs-2014-003627
- 44  
45 14. Rogers PJ. Using programme theory to evaluate complicated and complex aspects of  
46 interventions. *Evaluation* 2008;14: 29-48.
- 47  
48 15. Moore G, Audrey S, Barker M, et al. Process evaluation of complex interventions. Medical  
49 Research Council guidance. *BMJ* 2015 350:h1258.
- 50  
51 16. Fonteyn M, Kuipers B, Grobe S. A Description of Think Aloud Method and Protocol Analysis. *Qual*  
52 *Health Res* 1993;3(4):430-41. doi: 10.1177/10497323930030
- 53  
54 17. Craig P, Di Ruggiero E, Frohlich K, et al. Taking account of context in population health  
55 intervention research: guidance for producers, users and funders of research. Southampton:  
56 NIHR Evaluation, Trials and Studies Coordinating Centre 2018.
- 57  
58 18. Moore G, Evans R, Hawkins J, et al. From complex social interventions to interventions in  
59 complex social systems: Future directions and unresolved questions for intervention  
60 development and evaluation. *Evaluation* 2019;25(1):23-45. doi: 10.1177/1356389018803219
19. Hoffmann T, Glasziou P, Boutron I, et al. Better reporting of interventions: template for  
intervention description and replication (TIDieR) checklist and guide. *BMJ* 2014;348:g1687.  
doi: 10.1136/bmj.g1687

1  
2  
3  
4  
5  
6  
7  
8  
9  
10  
11  
12  
13  
14  
15  
16  
17  
18  
19  
20  
21  
22  
23  
24  
25  
26  
27  
28  
29  
30  
31  
32  
33  
34  
35  
36  
37  
38  
39  
40  
41  
42  
43  
44  
45  
46  
47  
48  
49  
50  
51  
52  
53  
54  
55  
56  
57  
58  
59  
60

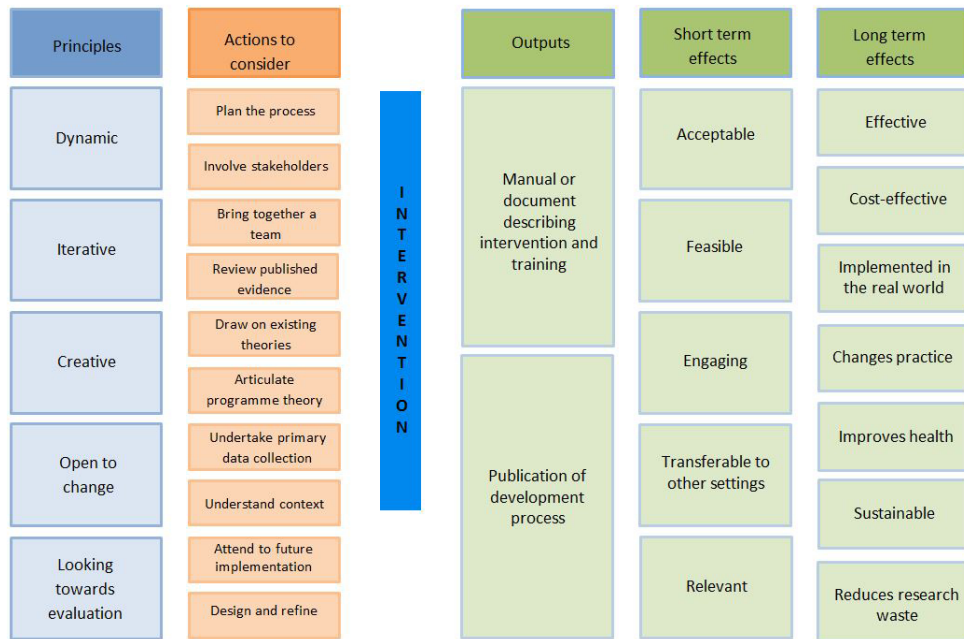

Figure 1 Logic model for intervention development – insert here

## Appendix 1 Results of the e-Delphis

The question asked was 'When developing complex interventions to improve health, how important is it to...' with options of very important=5, fairly important=4, somewhat important=3, slightly important=2, not at all important =1. Numbers stating 'Do Not Know' are not reported here.

The column '% agree' presents the percentage ticking very important=5 or fairly important=4.

Consensus was set at 70% agreement for 'very or fairly important' or 'slightly or not important at all'.

The items are presented in order of consensus for developers.

The dark shaded cells are the most frequently ticked options.

| No. | Item                                                                                          | Mode score | % Agree | Developers           |                    |                    |                  |                | Mode score | % Agree | Wider                |                    |                    |                  |                |
|-----|-----------------------------------------------------------------------------------------------|------------|---------|----------------------|--------------------|--------------------|------------------|----------------|------------|---------|----------------------|--------------------|--------------------|------------------|----------------|
|     |                                                                                               |            |         | Not at all important | Slightly important | Somewhat important | Fairly important | Very important |            |         | Not at all important | Slightly important | Somewhat important | Fairly important | Very important |
| 1   | Be open to the potential that the final intervention may be different from the initial vision | 5          | 100     | 0                    | 0                  | 0                  | 0                | 26             | 5          | 100     | 0                    | 0                  | 0                  | 2                | 16             |
| 2   | Report the purpose of the intervention                                                        | 5          | 100     | 0                    | 0                  | 0                  | 0                | 26             | 5          | 100     | 0                    | 0                  | 0                  | 1                | 16             |
| 3   | Report the target population                                                                  | 5          | 100     | 0                    | 0                  | 0                  | 1                | 25             | 5          | 100     | 0                    | 0                  | 0                  | 1                | 17             |
| 4   | Clearly define the health problem to be addressed                                             | 5          | 100     | 0                    | 0                  | 0                  | 1                | 24             | 5          | 100     | 0                    | 0                  | 0                  | 1                | 17             |
| 5   | Review the published evidence before starting to develop an intervention                      | 5          | 100     | 0                    | 0                  | 0                  | 1                | 24             | 5          | 100     | 0                    | 0                  | 0                  | 1                | 17             |
| 6   | Be open to failure and going back a step                                                      | 5          | 100     | 0                    | 0                  | 0                  | 2                | 24             | 5          | 100     | 0                    | 0                  | 0                  | 4                | 13             |
| 7   | Ensure team members understand the context in which the intervention will be implemented      | 5          | 100     | 0                    | 0                  | 0                  | 3                | 23             | 5          | 100     | 0                    | 0                  | 0                  | 3                | 15             |
| 8   | Report any use of components from an existing intervention                                    | 5          | 100     | 0                    | 0                  | 0                  | 4                | 22             | 4          | 100     | 0                    | 0                  | 0                  | 14               | 4              |

1  
2  
3  
4  
5  
6  
7  
8  
9  
10  
11  
12  
13  
14  
15  
16  
17  
18  
19  
20  
21  
22  
23  
24  
25  
26  
27  
28  
29  
30  
31  
32  
33  
34  
35  
36  
37  
38  
39  
40  
41  
42  
43  
44  
45  
46

|    |                                                                                                                    |   |     |   |   |   |    |    |   |     |   |   |   |    |    |
|----|--------------------------------------------------------------------------------------------------------------------|---|-----|---|---|---|----|----|---|-----|---|---|---|----|----|
| 9  | Report how evidence from different sources informed the intervention development                                   | 5 | 100 | 0 | 0 | 0 | 5  | 21 | 5 | 100 | 0 | 0 | 0 | 5  | 13 |
| 10 | Report how stakeholders contributed to the intervention development process                                        | 5 | 100 | 0 | 0 | 0 | 6  | 20 | 4 | 94  | 0 | 0 | 1 | 14 | 3  |
| 11 | Report important uncertainties at the end of the intervention development process.                                 | 5 | 100 | 0 | 0 | 0 | 7  | 19 | 5 | 78  | 0 | 1 | 3 | 0  | 14 |
| 12 | Look for and take into account evidence that your proposed intervention may not work in the way you intend         | 4 | 100 | 0 | 0 | 0 | 17 | 9  | 5 | 89  | 0 | 0 | 2 | 2  | 14 |
| 13 | Consider the evidence for each substantive intervention component                                                  | 5 | 100 | 0 | 0 | 0 | 11 | 15 | 4 | 94  | 0 | 0 | 1 | 17 | 0  |
| 14 | Have a plan to guide how you will use evidence during the design process                                           | 4 | 100 | 0 | 0 | 0 | 13 | 13 | 4 | 89  | 0 | 0 | 2 | 16 | 0  |
| 15 | Develop the intervention in an iterative way with regular stakeholder input throughout                             | 5 | 96  | 0 | 1 | 0 | 0  | 25 | 5 | 82  | 0 | 1 | 2 | 3  | 11 |
| 16 | Report the context for which the intervention was developed                                                        | 5 | 96  | 0 | 0 | 1 | 0  | 25 | 5 | 100 | 0 | 0 | 0 | 2  | 16 |
| 17 | Ensure the team includes experts in the problem to be addressed by the intervention                                | 5 | 96  | 0 | 1 | 0 | 1  | 24 | 5 | 94  | 0 | 0 | 1 | 1  | 16 |
| 18 | Consider facilitators and barriers to future use of the intervention in the real world                             | 5 | 96  | 0 | 1 | 0 | 1  | 24 | 5 | 94  | 0 | 0 | 1 | 1  | 16 |
| 19 | Ensure the team specifically includes a behaviour change scientist when the intervention aims to change behaviour. | 5 | 96  | 0 | 0 | 1 | 2  | 23 | 5 | 83  | 0 | 0 | 3 | 3  | 12 |
| 20 | Document key reasons for decisions made throughout the process                                                     | 5 | 96  | 0 | 0 | 1 | 3  | 22 | 5 | 82  | 0 | 0 | 3 | 2  | 12 |
| 21 | Clearly define the target population: the group of people that will receive the intervention                       | 5 | 96  | 0 | 0 | 1 | 3  | 22 | 5 | 100 | 0 | 0 | 0 | 1  | 17 |
| 22 | Ensure high levels of collaboration with stakeholders throughout the development process                           | 5 | 96  | 0 | 1 | 0 | 3  | 22 | 5 | 94  | 0 | 0 | 1 | 2  | 15 |

|    |                                                                                                                                           |   |    |    |    |   |    |    |   |     |   |    |   |    |    |
|----|-------------------------------------------------------------------------------------------------------------------------------------------|---|----|----|----|---|----|----|---|-----|---|----|---|----|----|
| 23 | Engage all relevant stakeholders                                                                                                          | 5 | 96 | 0  | 0  | 1 | 4  | 21 | 5 | 100 | 0 | 0  | 0 | 4  | 13 |
| 24 | Generate a programme theory/ logic model for how the intervention will have an effect                                                     | 5 | 96 | 0  | 0  | 1 | 4  | 21 | 4 | 94  | 0 | 0  | 1 | 13 | 3  |
| 25 | Identify existing interventions and consider whether they could be adapted                                                                | 5 | 96 | 0  | 0  | 1 | 4  | 21 | 5 | 100 | 0 | 0  | 0 | 2  | 15 |
| 26 | Seek stakeholders' perspectives on several possible versions of the intervention at a very early stage                                    | 5 | 96 | 0  | 0  | 1 | 4  | 21 | 5 | 89  | 0 | 1  | 1 | 5  | 11 |
| 27 | Carry out feasibility research throughout the intervention development                                                                    | 5 | 96 | 0  | 0  | 1 | 5  | 20 | 4 | 89  | 0 | 1  | 1 | 15 | 1  |
| 28 | Consider interactions between parts of the intervention                                                                                   | 4 | 96 | 0  | 0  | 1 | 20 | 5  | 5 | 94  | 0 | 0  | 1 | 7  | 9  |
| 29 | Develop a plan to integrate patient and public involvement (PPI) into the intervention development process                                | 5 | 96 | 1  | 0  | 0 | 5  | 20 | 5 | 83  | 0 | 0  | 3 | 2  | 13 |
| 30 | Stay open minded about the structure, content and delivery of the intervention                                                            | 5 | 96 | 0  | 0  | 1 | 5  | 20 | 5 | 94  | 0 | 0  | 1 | 6  | 11 |
| 31 | Report any changes to interventions required or likely to be required for subgroups                                                       | 5 | 96 | 0  | 0  | 1 | 6  | 19 | 4 | 83  | 0 | 1  | 2 | 9  | 6  |
| 32 | Focus on designing the content, format and delivery of the intervention as much as on gathering or synthesising the evidence to inform it | 4 | 96 | 0  | 0  | 1 | 17 | 8  | 4 | 78  | 0 | 0  | 4 | 13 | 1  |
| 33 | Have a team large enough to include individuals with all the necessary expertise.                                                         | 4 | 96 | 0  | 1  | 0 | 17 | 8  | 4 | 100 | 0 | 0  | 0 | 9  | 9  |
| 34 | Evaluate important components where there has been team disagreement about aspects of content, format or delivery                         | 4 | 96 | 0  | 0  | 1 | 15 | 10 | 4 | 72  | 0 | 0  | 5 | 13 | 0  |
| 35 | Do intervention development quickly                                                                                                       | 1 | 96 | 13 | 12 | 0 | 1  | 0  | 2 | 94  | 2 | 15 | 1 | 0  | 0  |
| 36 | Ensure the team includes members who are skilled at maximising engagement of                                                              | 5 | 96 | 0  | 0  | 1 | 12 | 13 | 4 | 83  | 0 | 0  | 3 | 11 | 4  |

1  
2  
3  
4  
5  
6  
7  
8  
9  
10  
11  
12  
13  
14  
15  
16  
17  
18  
19  
20  
21  
22  
23  
24  
25  
26  
27  
28  
29  
30  
31  
32  
33  
34  
35  
36  
37  
38  
39  
40  
41  
42  
43  
44  
45  
46

|    | stakeholders                                                                                                                           |   |    |   |   |   |    |    |   |     |   |   |   |    |    |
|----|----------------------------------------------------------------------------------------------------------------------------------------|---|----|---|---|---|----|----|---|-----|---|---|---|----|----|
| 37 | Involve stakeholders who are members of the target population.                                                                         | 5 | 92 | 0 | 0 | 2 | 0  | 24 | 5 | 100 | 0 | 0 | 0 | 4  | 14 |
| 38 | Identify an existing published theory or theories to inform the intervention at the start                                              | 4 | 92 | 0 | 1 | 0 | 21 | 3  | 4 | 100 | 0 | 0 | 0 | 17 | 1  |
| 39 | Report how any published intervention development approach contributed to the development process                                      | 5 | 92 | 0 | 0 | 2 | 3  | 21 | 4 | 71  | 0 | 0 | 5 | 11 | 1  |
| 40 | Report how existing published theory informed the intervention development process                                                     | 5 | 92 | 0 | 0 | 2 | 3  | 21 | 5 | 94  | 0 | 0 | 1 | 5  | 12 |
| 41 | Check that the proposed mechanisms of action are supported by early testing                                                            | 4 | 92 | 0 | 1 | 1 | 18 | 6  | 5 | 94  | 0 | 0 | 1 | 3  | 14 |
| 42 | Undertake qualitative data collection to understand the context in which the intervention will be delivered                            | 5 | 92 | 0 | 1 | 1 | 8  | 16 | 4 | 83  | 0 | 0 | 3 | 12 | 3  |
| 43 | Consider unintended consequences of the intervention                                                                                   | 5 | 92 | 0 | 0 | 2 | 9  | 15 | 5 | 94  | 0 | 0 | 1 | 8  | 9  |
| 44 | Ensure all members of the team have the skills and personal qualities to contribute constructively in an interdisciplinary environment | 5 | 92 | 0 | 1 | 1 | 9  | 15 | 4 | 78  | 0 | 1 | 3 | 14 | 0  |
| 45 | Report any guiding principles, people or factors which were prioritised when making decisions                                          | 5 | 92 | 0 | 0 | 2 | 11 | 13 | 4 | 83  | 0 | 1 | 2 | 13 | 2  |
| 46 | Collect data from a diverse sample of those who will deliver and receive the intervention                                              | 5 | 92 | 0 | 1 | 1 | 10 | 13 | 4 | 94  | 0 | 0 | 1 | 15 | 2  |
| 47 | Consider the different levels that the intervention may target and impact (patients, professionals, communities, services)             | 5 | 88 | 0 | 0 | 3 | 2  | 21 | 4 | 94  | 0 | 1 | 0 | 11 | 6  |

|    |                                                                                                                   |   |    |   |   |   |    |    |   |     |   |   |    |    |    |
|----|-------------------------------------------------------------------------------------------------------------------|---|----|---|---|---|----|----|---|-----|---|---|----|----|----|
| 48 | Draw on a published intervention development approach                                                             | 4 | 88 | 0 | 2 | 1 | 20 | 3  | 3 | 6   | 0 | 1 | 16 | 1  | 0  |
| 49 | Test and refine the programme theory, or logic model, within the development process                              | 5 | 88 | 0 | 0 | 3 | 5  | 18 | 4 | 94  | 0 | 1 | 0  | 14 | 2  |
| 50 | Specify gaps and uncertainties in the existing evidence                                                           | 4 | 88 | 0 | 0 | 3 | 16 | 7  | 5 | 94  | 0 | 0 | 1  | 6  | 11 |
| 51 | Ensure the team includes individuals with a strong track record in designing complex interventions                | 5 | 88 | 1 | 0 | 2 | 8  | 15 | 4 | 88  | 0 | 0 | 2  | 14 | 2  |
| 52 | Report how the intervention changed in content and format from the start of the intervention development process  | 4 | 88 | 0 | 3 | 0 | 15 | 8  | 4 | 94  | 0 | 1 | 0  | 13 | 4  |
| 53 | Report the reasons for discarding intervention components that were considered                                    | 5 | 88 | 0 | 0 | 3 | 9  | 14 | 4 | 88  | 0 | 0 | 2  | 15 | 0  |
| 54 | Use the term 'intervention development' in the title and abstract of any report or publication.                   | 4 | 85 | 1 | 2 | 1 | 18 | 4  | 3 | 24  | 1 | 2 | 10 | 2  | 2  |
| 55 | Identify sub-populations that the intervention may need to be adapted for or tailored to                          | 4 | 85 | 0 | 0 | 4 | 14 | 8  | 4 | 83  | 0 | 1 | 2  | 14 | 1  |
| 56 | Produce an intervention development protocol detailing the processes to be undertaken to develop the intervention | 5 | 85 | 0 | 2 | 2 | 10 | 12 | 4 | 88  | 0 | 0 | 2  | 15 | 0  |
| 57 | Apply a published intervention development approach flexibly depending on context                                 | 5 | 84 | 0 | 1 | 3 | 7  | 14 | 4 | 83  | 0 | 0 | 3  | 14 | 1  |
| 58 | Follow TIDieR guidance when describing the developed intervention                                                 | 5 | 80 | 3 | 0 | 2 | 7  | 13 | 5 | 88  | 0 | 0 | 2  | 6  | 9  |
| 59 | Collect evidence using a diverse range of methods                                                                 | 5 | 80 | 0 | 0 | 5 | 9  | 11 | 4 | 100 | 0 | 0 | 0  | 17 | 1  |
| 60 | Draw on more than one existing published theory e.g. both psychological and                                       | 4 | 77 | 0 | 2 | 4 | 19 | 1  | 4 | 50  | 1 | 0 | 8  | 9  | 0  |

1  
2  
3  
4  
5  
6  
7  
8  
9  
10  
11  
12  
13  
14  
15  
16  
17  
18  
19  
20  
21  
22  
23  
24  
25  
26  
27  
28  
29  
30  
31  
32  
33  
34  
35  
36  
37  
38  
39  
40  
41  
42  
43  
44  
45  
46

| organisational theories |                                                                                                                                            |   |    |   |    |    |    |    |   |    |   |   |    |    |    |
|-------------------------|--------------------------------------------------------------------------------------------------------------------------------------------|---|----|---|----|----|----|----|---|----|---|---|----|----|----|
| 61                      | Have a small sub-team that makes final decisions about the intervention                                                                    | 4 | 77 | 1 | 1  | 4  | 19 | 1  | 4 | 61 | 1 | 0 | 6  | 10 | 1  |
| 62                      | Use the existing published theories that you have identified to inform the collection of evidence                                          | 4 | 77 | 1 | 1  | 4  | 16 | 4  | 4 | 67 | 0 | 0 | 6  | 12 | 0  |
| 63                      | Agree a process for making decisions within the team about intervention content, format and delivery                                       | 5 | 77 | 0 | 0  | 6  | 5  | 15 | 4 | 94 | 0 | 0 | 1  | 15 | 1  |
| 64                      | Report the intervention development in an open access format (e.g. open access journal, report chapter, website)                           | 4 | 77 | 1 | 1  | 4  | 13 | 7  | 5 | 89 | 0 | 0 | 2  | 5  | 11 |
| 65                      | Have a funded study with sufficient resources                                                                                              | 4 | 73 | 0 | 0  | 7  | 14 | 5  | 5 | 88 | 0 | 0 | 2  | 1  | 14 |
| 66                      | Establish a set of guiding principles to facilitate decision making about intervention content, format and delivery                        | 4 | 73 | 0 | 1  | 6  | 12 | 7  | 4 | 76 | 0 | 0 | 4  | 11 | 2  |
| 67                      | Ensure the intervention development team members know their specific roles, rights and responsibilities                                    | 5 | 73 | 0 | 0  | 7  | 8  | 11 | 5 | 83 | 1 | 1 | 1  | 2  | 13 |
| 68                      | Follow every step in a published intervention development approach                                                                         | 2 | 69 | 3 | 15 | 6  | 1  | 1  | 3 | 59 | 5 | 5 | 7  | 0  | 0  |
| 69                      | Include all stakeholders when making final decisions about the intervention                                                                | 4 | 58 | 0 | 2  | 9  | 12 | 3  | 4 | 83 | 0 | 1 | 2  | 13 | 2  |
| 70                      | Ensure the team includes a commissioner or purchaser of health care                                                                        | 2 | 54 | 1 | 13 | 8  | 3  | 1  | 3 | 33 | 1 | 5 | 10 | 1  | 1  |
| 71                      | Try to design the intervention for use in a wide range of settings                                                                         | 2 | 52 | 1 | 12 | 7  | 5  | 0  | 3 | 17 | 0 | 1 | 14 | 3  | 0  |
| 72                      | Periodically consider whether additional or alternative existing published theories may be helpful to inform the intervention development. | 4 | 50 | 1 | 2  | 10 | 13 | 0  | 4 | 67 | 0 | 1 | 5  | 12 | 0  |



|    |                                                                                                                                             |   |    |   |    |    |    |   |   |    |   |   |    |    |   |
|----|---------------------------------------------------------------------------------------------------------------------------------------------|---|----|---|----|----|----|---|---|----|---|---|----|----|---|
| 73 | Have a formal consensus exercise to finalise the content, format and delivery of the intervention                                           | 2 | 50 | 1 | 12 | 7  | 4  | 2 | 3 | 22 | 1 | 3 | 13 | 1  | 0 |
| 74 | Have equity of decision making amongst key stakeholders and researchers                                                                     | 2 | 50 | 2 | 11 | 9  | 2  | 2 | 3 | 22 | 3 | 1 | 10 | 2  | 2 |
| 75 | The team uses methods to enable stakeholders to be creative                                                                                 | 3 | 46 | 0 | 1  | 13 | 6  | 6 | 4 | 78 | 0 | 2 | 2  | 12 | 2 |
| 76 | Ensure the team includes someone with a background specifically in product or pathway design                                                | 4 | 46 | 0 | 3  | 11 | 12 | 0 | 4 | 65 | 0 | 3 | 3  | 11 | 0 |
| 77 | Undertake statistical and economic modelling to consider whether an intervention is likely to be worthwhile                                 | 2 | 46 | 3 | 9  | 3  | 8  | 3 | 4 | 56 | 0 | 3 | 5  | 9  | 1 |
| 78 | Report the background and contribution of those making decisions about the intervention content, format and delivery                        | 3 | 42 | 0 | 4  | 11 | 6  | 5 | 4 | 67 | 1 | 0 | 5  | 10 | 2 |
| 79 | Consider the potential cost of several possible versions of the intervention at a very early stage                                          | 3 | 35 | 0 | 2  | 15 | 8  | 1 | 3 | 0  | 0 | 0 | 18 | 0  | 0 |
| 80 | Have a clear plan of how evidence, data and opinions from different sources will be prioritised and inform the final intervention           | 3 | 35 | 0 | 2  | 15 | 7  | 2 | 4 | 94 | 0 | 0 | 1  | 16 | 0 |
| 81 | Report the time taken to develop the intervention                                                                                           | 3 | 27 | 1 | 1  | 17 | 4  | 3 | 3 | 17 | 0 | 3 | 14 | 1  | 0 |
| 82 | Consider intellectual property (IP) issues                                                                                                  | 3 | 27 | 3 | 1  | 15 | 4  | 3 | 3 | 39 | 0 | 5 | 6  | 6  | 1 |
| 83 | Report who, when, why and where the original idea for developing the intervention came from                                                 | 3 | 27 | 3 | 1  | 15 | 5  | 2 | 4 | 67 | 2 | 1 | 3  | 9  | 3 |
| 84 | Undertake a quantitative optimisation process to ensure only the strongest components of the intervention are included in the final version | 3 | 27 | 2 | 5  | 15 | 4  | 0 | 3 | 19 | 1 | 2 | 13 | 0  | 0 |

1  
2  
3  
4  
5  
6  
7  
8  
9  
10  
11  
12  
13  
14  
15  
16  
17  
18  
19  
20  
21  
22  
23  
24  
25  
26  
27  
28  
29  
30  
31  
32  
33  
34  
35  
36  
37  
38  
39  
40  
41  
42  
43  
44  
45  
46

|    |                                                                           |   |    |   |   |    |   |   |   |    |   |   |    |   |   |
|----|---------------------------------------------------------------------------|---|----|---|---|----|---|---|---|----|---|---|----|---|---|
| 85 | Ensure the team includes someone who has developed a similar intervention | 3 | 23 | 1 | 5 | 17 | 3 | 0 | 3 | 22 | 1 | 3 | 14 | 0 | 0 |
|----|---------------------------------------------------------------------------|---|----|---|---|----|---|---|---|----|---|---|----|---|---|

For peer review only

## Appendix 2 Description of third round e-Delphi participants and consensus group

26 participants completed the developers' e-Delphi third round questionnaire. They were from the UK (n=16), mainland Europe (n=5), Ireland (n=4) and USA (n=1). They had published at least one intervention development study (n=21) or written methodological books or journal articles about intervention development (n=5). Backgrounds are difficult to report simply because people had a range of academic or clinical disciplines which might differ from the title of the department they worked in. We categorised some people under more than one heading. Backgrounds included public health (n=10), applied health research/health services research (n=8), psychology (n=7), nursing (n=6), and allied health professionals (n=1).

18 participants completed the wider stakeholders' e-Delphi third round questionnaire. They were from the UK (n=16), mainland Europe (n=1) and USA (n=1). They were selected for their roles as chairs or members of funding panels (n=5), editors or editorial board members of journals (n=4), commissioners of services (n=3), public and patient involvement (n=3), and other (n=3).

26 participants external to the research team attended the consensus conference in person or by video link/telephone. They were from the UK (n=19), USA (n=3), mainland Europe (n=3), and Ireland (n=1). They were invited in their role as intervention developer (n=13), methodologist (n=4), chair of funding panel (n=3), journal editor (n=3), public and patient representative (n=1), commissioner (n=1), and other (n=1).
